# Supplementary material for: Accuracy of emergency medical services (EMS) telephone triage in identifying acute coronary syndrome (ACS) for patients with chest pain: a systematic literature review
Source: PubMed Central journal article supplement — BMJ Open. 2021 Aug 25;11(8):e045815. doi: 10.1136/bmjopen-2020-045815 (PMC8388270; doi:10.1136/bmjopen-2020-045815), 2021-08-25
Supplement: bmjopen-2020-045815.draft_revisions.pdf [file bmjopen-2020-045815.draft_revisions.pdf]

# BMJ Open

BMJ Open is committed to open peer review. As part of this commitment we make the peer review history of every article we publish publicly available.

When an article is published we post the peer reviewers' comments and the authors' responses online. We also post the versions of the paper that were used during peer review. These are the versions that the peer review comments apply to.

The versions of the paper that follow are the versions that were submitted during the peer review process. They are not the versions of record or the final published versions. They should not be cited or distributed as the published version of this manuscript.

BMJ Open is an open access journal and the full, final, typeset and author-corrected version of record of the manuscript is available on our site with no access controls, subscription charges or pay-per-view fees (<http://bmjopen.bmj.com>).

If you have any questions on BMJ Open's open peer review process please email [info.bmjopen@bmj.com](mailto:info.bmjopen@bmj.com)

# BMJ Open

## Accuracy of emergency medical services (EMS) telephone triage in identifying acute coronary syndrome (ACS) for chest pain patients: A systematic literature review

|                               |                                                                                                                                                                                                                                                                                                              |
|-------------------------------|--------------------------------------------------------------------------------------------------------------------------------------------------------------------------------------------------------------------------------------------------------------------------------------------------------------|
| Journal:                      | <i>BMJ Open</i>                                                                                                                                                                                                                                                                                              |
| Manuscript ID                 | bmjopen-2020-045815                                                                                                                                                                                                                                                                                          |
| Article Type:                 | Original research                                                                                                                                                                                                                                                                                            |
| Date Submitted by the Author: | 17-Oct-2020                                                                                                                                                                                                                                                                                                  |
| Complete List of Authors:     | Alotaibi, Ahmed; The University of Manchester, Division of Cardiovascular Sciences<br>alghamdi, abdulrhman; The University of Manchester<br>Reynard, Charles; University of Manchester, Division of Cardiovascular sciences;<br>Body, Richard; University of Manchester, Division of Cardiovascular Sciences |
| Keywords:                     | Myocardial infarction < CARDIOLOGY, Coronary heart disease < CARDIOLOGY, ACCIDENT & EMERGENCY MEDICINE                                                                                                                                                                                                       |
|                               |                                                                                                                                                                                                                                                                                                              |

SCHOLARONE™  
Manuscripts

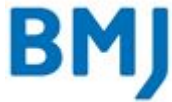

I, the Submitting Author has the right to grant and does grant on behalf of all authors of the Work (as defined in the below author licence), an exclusive licence and/or a non-exclusive licence for contributions from authors who are: i) UK Crown employees; ii) where BMJ has agreed a CC-BY licence shall apply, and/or iii) in accordance with the terms applicable for US Federal Government officers or employees acting as part of their official duties; on a worldwide, perpetual, irrevocable, royalty-free basis to BMJ Publishing Group Ltd ("BMJ") its licensees and where the relevant Journal is co-owned by BMJ to the co-owners of the Journal, to publish the Work in this journal and any other BMJ products and to exploit all rights, as set out in our [licence](#).

The Submitting Author accepts and understands that any supply made under these terms is made by BMJ to the Submitting Author unless you are acting as an employee on behalf of your employer or a postgraduate student of an affiliated institution which is paying any applicable article publishing charge ("APC") for Open Access articles. Where the Submitting Author wishes to make the Work available on an Open Access basis (and intends to pay the relevant APC), the terms of reuse of such Open Access shall be governed by a Creative Commons licence – details of these licences and which [Creative Commons](#) licence will apply to this Work are set out in our licence referred to above.

Other than as permitted in any relevant BMJ Author's Self Archiving Policies, I confirm this Work has not been accepted for publication elsewhere, is not being considered for publication elsewhere and does not duplicate material already published. I confirm all authors consent to publication of this Work and authorise the granting of this licence.

1  
2  
3  
4 **Accuracy of emergency medical services (EMS) telephone triage in identifying acute**  
5 **coronary syndrome (ACS) for chest pain patients: A systematic literature review**  
6  
7  
8  
9

10 A) Ahmed Alotaibi <sup>(1)(2)</sup>, Abdulrhman Alghamdi <sup>(1)(2)</sup>, Charles Reynard <sup>(1)(3)</sup>, Richard Body  
11 <sup>(1)(3)</sup>  
12  
13

14  
15  
16 B) Ahmed Alotaibi  
17 Division of Cardiovascular Sciences  
18 Core Technology Facility  
19 The University of Manchester  
20 46 Grafton St, Manchester  
21 M13 9WU  
22 United Kingdom  
23 E-mail : [ahmed.alotaibi@postgrad.manchester.ac.uk](mailto:ahmed.alotaibi@postgrad.manchester.ac.uk)  
24  
25  
26  
27  
28

29 C) Ahmed Alotaibi  
30  
31

- 32 1. Division of Cardiovascular Sciences, University of Manchester, Manchester, UK.
- 33 2. College of Applied Medical Sciences, King Saud bin Abdulaziz University for Health  
34 Sciences, Riyadh, Saudi Arabia
- 35 3. Emergency Department, Manchester University NHS Foundation  
36 Trust, Manchester, UK  
37  
38

39 Abdulrhman Alghamdi

- 40 1. Division of Cardiovascular Sciences, University of Manchester, Manchester, UK.
- 41 2. College of Applied Medical Sciences, King Saud bin Abdulaziz University for Health  
42 Sciences, Riyadh, Saudi Arabia  
43  
44

45 Charles Reynard

- 46 1. Division of Cardiovascular Sciences, University of Manchester, Manchester, UK.  
47  
48  
49
- 50 3. Emergency Department, Manchester University NHS Foundation  
51 Trust, Manchester, UK  
52  
53

54 Richard Body

- 55 1. Division of Cardiovascular Sciences, University of Manchester, Manchester, UK.  
56  
57 3) Emergency Department, Manchester University NHS Foundation  
58 Trust, Manchester, UK  
59  
60

- 1  
2  
3 D) Pre-hospital, Chest pain, telephone triage, ACS, Life-threatening conditions,  
4 E) Words count: 2804  
5  
6  
7  
8

9 **Abstract;**

10  
11 **Objective:**

12  
13 To systematically appraise the available evidence to determine the diagnostic accuracy of the  
14  
15 EMS telephone triage for patients with chest pain suspected to be caused by ACS or life-  
16  
17 threatening conditions.  
18  
19

20 **Design:**

21  
22 Systematic review.  
23  
24

25 **Data sources:**

26  
27 Electronic searches were performed in Embase, Medline, and Cinahl databases for relevant  
28  
29 papers.  
30  
31

32 **Eligible criteria:**

33  
34 The review included all types of original studies with adult patients (>18 years with a primary  
35  
36 complaint of chest pain who called EMS for an ambulance and evaluated dispatch triage  
37  
38 priority, and linked to final diagnosis of ACS, acute myocardial infarction (AMI), or other  
39  
40 life-threatening conditions.  
41  
42

43 **Data extraction and synthesis:**

44  
45 standardised data extraction form was used to extract and collect data as study design,  
46  
47 population, study period, and outcome. Also, all data required were extracted for diagnostic  
48  
49 accuracy assessment including 2x2 tables when available for dispatch priority and prediction  
50  
51 models priority for suspected ACS, or life-threatening conditions. Two authors independently  
52  
53 extracted the data. Risk of bias was assessed using (QUADAS-2) assessment tool.  
54  
55  
56  
57  
58

59 **Result:**  
60

1  
2  
3 In total, 553 studies were identified from the literature search and cross-referencing. After  
4  
5 excluding 550 studies, three were eligible for inclusion. Among those 3 studies, there are  
6  
7 different prediction models developed by authors with variation in variables used to detect  
8  
9 ACS. The overall result showed that dispatch triage tools have good sensitivity to detect ACS  
10  
11 and life-threatening conditions even though they are used to triage sign and symptoms rather  
12  
13 than diagnosing the patients. On the other hand, prediction models were built to detect ACS  
14  
15 and life-threatening conditions and therefore it showed better sensitivity and NPV.  
16  
17  
18  
19  
20  
21

### 22 **Conclusion:**

23  
24 EMS dispatch systems accuracy for ACS and life-threatening conditions associated with  
25  
26 chest pain is good. Since the dispatch tools were built to triage ambulance response priority  
27  
28 based on sign and symptoms, this lead to over triage among non life-threatening chest pain  
29  
30 patients. Over triage were slightly reduced by deriving different prediction models and  
31  
32 showed better sensitivity.  
33  
34  
35  
36  
37  
38  
39  
40  
41  
42  
43  
44  
45  
46  
47  
48  
49  
50  
51  
52  
53  
54  
55  
56  
57  
58  
59  
60

**Strength and limitations:**

- Up to our knowledge, this is the first systematic review looking into the accuracy of pre-hospital chest pain telephone triage.
- It is possible that some relevant papers were missed because we only included studies that have adult participants who are >18 years old and we excluded papers not published in English language.
- Unfortunately, we couldn't conduct a meta-analysis as there was variations between dispatch system tools and priority types.
- Also, there was a difference in the definition of life-threatening conditions definition between included studies.

**Abbreviations list:**

ED: Emergency Department; ACS : Acute Coronary Syndrome; AMI: Acute Myocardial Infarction; ECG: Electrocardiogram; NPV: Negative Productive Value; QUADAS: Quality Assessment of Diagnostic Accuracy Studies; PPV: Positive Predictive Value; STEMI: ST-Elevation Myocardial Infarction; ACS: Acute Coronary Syndrome;

**Keywords:**

Pre-hospital, Chest pain, telephone triage, ACS

## Background:

Chest pain, which is one of the main symptoms of ACS, is one of the most common reasons for ambulance callouts and presentations to EDs (1, 2). Patients with ACS typically present with chest pain. However, the majority patients with chest pain transported by ambulance are ultimately diagnosed with self-limiting, non-cardiac disease. Thus, chest pain leads to over-triage patients and increases ambulance resource consumption, and crowded EDs (2, 3).

Two EMS dispatch systems are currently used in the UK: the Advanced Medical Prioritizing Dispatching System (AMPDS), and the National Health Service (NHS 999) System (4). Both systems use computerized telephone triage software that identify life-threatening conditions by a series of questions at the beginning of the call. For patients with a primary complaint of chest pain, they also include a specific series of questions to identify ACS and triage the case using the patient's sign and symptoms (3, 5). However, systematic reviews have shown that the accuracy of medical triage systems are backed by a low level of evidence (6, 7). There is also insufficient data on the dispatch protocol efficiency (7, 8). There is no consensus on the definitions used in Criteria Based Dispatch (CBD), which is program used to patients by signs and symptoms, and AMPDS (9, 10). Also, there is no consensus on the accepted level for over-triage, under-triage for medical emergency dispatch (6, 9). Therefore, systematic over-triage for chest pain patients is used as safe method by dispatch system to avoid potential harm to patients. As a result, it caused an over use of EMS resources (6) and showed difference between clinical findings and dispatch priority (8, 9). Therefore, with the current clinical guidelines for emergency medical services (EMS), it is hard to rule in or rule out ACS by telephone-triage (11).



1  
2  
3 We aimed systematically to appraise the available evidence to determine the diagnostic  
4 accuracy of the EMS telephone triage for patients with chest pain suspected to be caused by  
5 ACS or life-threatening conditions.  
6  
7  
8  
9  
10  
11

## 12 **Methods:**

13  
14  
15  
16  
17 The systematic review was conducted in accordance with PRISMA guidelines and following  
18 Cochrane methodology for diagnostic test accuracy reviews (12). PRISMA checklist  
19 provided in supplementary appendix. This systematic review was pre-registered on the  
20 PROSPERO database (reference CRD42020171184)  
21  
22  
23  
24  
25  
26  
27

## 28 ***Search strategy and eligibility criteria:***

29  
30  
31  
32  
33 We searched the Embase, Medline, and Cinahl databases on 3/03/2020 for the terms “chest  
34 pain, telephone or dispatch, triage, ACS or AMI, life-threatening conditions, and EMS or  
35 prehospital”. Retrospective and prospective cohort studies written in English and  
36  
37  
38 investigating EMS telephone triage for chest pain patients linked with final diagnosis of  
39  
40  
41 ACS, or life-threatening conditions were eligible.  
42  
43  
44  
45  
46

## 47 ***Studies included:***

48  
49 Based on the inclusion criteria, titles and abstracts were independently screened and  
50  
51 shortlisted by two reviewers (AbA and ChR). The inclusion criteria were: (1) the study  
52  
53 included adult patients (>18 years); (2) the study included patients with a primary complaint  
54  
55 of chest pain who called EMS for an ambulance; (3) the studied evaluated dispatch triage  
56  
57 priority; (4) the study provided data for a linked final diagnosis of ACS, acute myocardial  
58  
59  
60

1  
2  
3 infarction (AMI), or other life-threatening conditions. Two reviewers independently reviewed  
4  
5 and screened potentially relevant full text papers to identify those fulfilling the inclusion  
6  
7 criteria. Any discrepancies between the reviewers were resolved by a third reviewer (AhA).  
8  
9

### 10 11 12 ***Outcome measures:***

13  
14 The primary outcome was a diagnosis of ACS, including ST elevation myocardial infarction  
15  
16 (STEMI), non-ST elevation myocardial infarction (NSTEMI) and unstable angina. AMI  
17  
18 (incorporating both STEMI and NSTEMI) is defined according to the universal definition of  
19  
20 AMI (13). Unstable Angina is defined as sudden prolonged chest pain at rest >20 minutes,  
21  
22 new onset severe angina, or previous angina that is increasing in severity of pain, duration of  
23  
24 pain, and/or frequency (14).  
25  
26  
27  
28  
29

30  
31 The secondary outcome was the diagnosis of a life-threatening condition associated with  
32  
33 chest pain. Since there is no universal definition for life-threatening conditions associated  
34  
35 with chest pain, we included all relevant data from the studies, regardless of the precise  
36  
37 definition used for 'life-threatening conditions'.  
38  
39  
40  
41

### 42 ***Methodological quality assessment:***

43  
44 The quality assessment of eligible articles was independently assessed by two reviewers  
45  
46 (AhA and AbA), using modified Quality Assessment of Diagnostic Accuracy Studies  
47  
48 (QUADAS-2) tool to suit the purpose of this systematic review (15). Discrepancies between  
49  
50 reviewers were solved by discussion.  
51  
52  
53  
54

### 55 ***Data extraction:***

1  
2  
3 After selecting the eligible studies, two investigators (AhA and AbA) used a standardised  
4 data extraction form to extract and collect data as study design, population, study period, and  
5  
6 outcome. Also, both investigators extracted all data required for diagnostic accuracy  
7  
8 assessment including 2x2 tables when available for dispatch priority and prediction models  
9  
10  
11  
12 priority for suspected ACS, or life-threatening conditions.  
13  
14  
15  
16  
17  
18

### 19 ***Statistical analysis:***

20  
21  
22  
23  
24 In line with our protocol, we considered pooling sensitivities, specificities, negative and  
25  
26 positive predictive values (NPV and PPV, respectively) by meta-analysis. However, after  
27  
28 reviewing the final list of studies meeting inclusion criteria, the reviewers unanimously  
29  
30 concluded that meta-analysis would have been inappropriate due to clear evidence of clinical  
31  
32 heterogeneity between studies, and missing data. We therefore undertook a narrative  
33  
34 synthesis of the existing evidence.  
35  
36  
37  
38  
39

### 40 **Results:**

41  
42  
43  
44  
45 In total, our literature search identified 553 potentially relevant articles of which 26 articles  
46  
47 were considered eligible for inclusion after titles and abstract screening. After independent  
48  
49 full text review, 23 articles were excluded and 3 articles met the inclusion criteria for this  
50  
51 review (Figure 1). Excluded studies with reason of exclusion is shown in the supplementary  
52  
53 appendix. (16-18).  
54  
55  
56  
57

### 58 **Study Characteristics and Quality Assessments:**

1  
2  
3  
4  
5  
6 General study characteristics are summarized in Table 1. Patient characteristics and study  
7  
8 weaknesses are summarised in Table 2. The details of the prediction models identified,  
9  
10 together with the test characteristics (including sensitivity, specificity, NPV, and PPV) for the  
11  
12 diagnosis of ACS and life-threatening conditions are shown in Tables 3 and 4.

13  
14 The modified QUADAS-2 methodological quality assessment tool was used to assess all  
15  
16 eligible studies as shown in the supplementary appendix 2. A summary of the quality  
17  
18 assessment for each eligible study is shown in Figure 2. Two out of the three studies were  
19  
20 retrospective cohort studies and compared the dispatch triage for ambulance response priority  
21  
22 to the prediction model (16, 17) and one was prospective cohort study that only testing  
23  
24 prediction model accuracy (18). ACS was adjudicated by experts in only one study (18)  
25  
26 while the other two studies used the hospital final diagnosis of ACS, AMI, or life-threatening  
27  
28 conditions. All eligible studies utilized the appropriate ACS or AMI definitions at the time of  
29  
30 conducting the study.  
31  
32  
33  
34

### 35 **Summary of the existing evidence**

36  
37  
38  
39  
40 *Gellerstedt et al* derived a prediction model to detect AMI and life-threatening conditions  
41  
42 patients calling for an emergency ambulance with chest pain. They aimed to effectively triage  
43  
44 calls to determine the appropriate level of response (capable of providing advanced life  
45  
46 support vs only basic life support). The final model used eight variables (age, gender, strong  
47  
48 pain, dyspnoea, cold sweat, nausea, vertigo, and syncope) to calculate the probability of AMI  
49  
50 or a life-threatening condition. Setting an arbitrary cut-off, the authors found that the model  
51  
52 had greater sensitivity than and similar specificity to the judgement of the call handlers,  
53  
54 which could potentially improve triage. However, performance of the model was only  
55  
56 evaluated in the derivation set, with no validation presented (16).  
57  
58  
59  
60

1  
2  
3  
4  
5  
6 In 2006, the same group derived a new prediction model in another study. They aimed to  
7  
8 determine whether a computer-based decision support system could have superior accuracy  
9  
10 for identifying life threatening conditions or ACS in patients who called for an emergency  
11  
12 ambulance with chest pain. *Gellerstedt et al* collected data from patients who called 112  
13  
14 complaining of chest pain using ten questions related to ACS with yes or no answers (17).  
15  
16 They derived two prediction models based on those answers. The first prediction model (full  
17  
18 model) incorporated data from all ten questions that dispatchers had asked, including: age,  
19  
20 gender, central chest pain, high intensity pain, pain duration between 15 minutes and 24  
21  
22 hours, aggravated pain when breathing or moving, abnormal breathing, cold sweat, diabetes  
23  
24 or previous CVD, previous ACS, and belief that symptoms are heart-related. The authors also  
25  
26 derived a 'limited model', which only included variables that had a significant association  
27  
28 with the presence of ACS or a life-threatening condition on bivariate analysis. These  
29  
30 included: gender, age, central chest pain, high intensity pain, previous ACS, and a high  
31  
32 priority based on dispatcher judgement. There was no significant difference in performance  
33  
34 between the full model and limited model. However, both the limited and full models had  
35  
36 superior sensitivity to the priority assigned by dispatchers in practice, both for ACS (Table 3)  
37  
38 and life-threatening conditions (Table 4), with similar specificity (17). The model was  
39  
40 derived in 70% of the available cohort and validated in the remaining 30%. The authors state  
41  
42 that performance was 'similar' in the validation set, although no further details were  
43  
44 provided.  
45  
46  
47  
48  
49  
50  
51  
52  
53

54 *Reuter et al* used backward logistic regression to derive two separate prediction models to  
55  
56 detect ACS among men and women, respectively (18). The male prediction model to detect  
57  
58 ACS consisted of 8 variables, which are: age, smoking, severe pain, permanent pain,  
59  
60

1  
2  
3 breathing non-related pain, retrosternal pain, radiating pain, and additional symptoms. The  
4  
5 female prediction model to detect ACS consisted of four variables, which are: age >60 years,  
6  
7 history of coronary artery disease, breathing non-related pain, and radiating pain.  
8  
9

10  
11  
12 The male prediction model had an area under the receiver operating characteristic curve  
13  
14 (AUC) of 0.76 (95% CI 0.73 – 0.79) in the derivation set (70% of the sample, which was  
15  
16 randomly selected), which was maintained at 0.76 (95% CI 0.73 – 0.80) in the internal  
17  
18 validation set (30% of the cohort). However, while the female prediction model had a similar  
19  
20 AUC in the derivation set (0.79, 95% CI 0.75 – 0.83), it had lower accuracy in the validation  
21  
22 set (AUC 0.67, 95% CI 0.60 – 0.74). No data were presented to enable calculation of  
23  
24 sensitivity, specificity, PPV or NPV, and the output of the model was not compared to  
25  
26 standard care or clinical judgement.  
27  
28  
29

### 30 31 32 33 **Discussion:**

34  
35  
36  
37 In this systematic review, we have identified three studies that presented the derivation of  
38  
39 clinical prediction models to enhance the telephone triage of patients calling for an  
40  
41 emergency ambulance with chest pain. None of the models presented had sufficiently high  
42  
43 sensitivity to avoid the need for ambulance dispatch. The model derived by Gellerstedt *et al*  
44  
45 (2006) used an outdated definition of AMI (using creatine kinase-MB as the reference  
46  
47 standard biomarker), meaning that the results could not be applied to modern clinical  
48  
49 practice. The second model derived by Gellerstedt *et al* (2016) underwent internal validation,  
50  
51 but full details that validation were not published. Finally, Reuter *et al* derived two prediction  
52  
53 models (for men and women, respectively) but did not present sufficient data to compare  
54  
55 their performance to standard care. The prediction model for females had a poor AUC (0.67)  
56  
57  
58  
59  
60

1  
2  
3 on internal validation. We identified no prediction models that have undergone external  
4  
5 validation.  
6  
7  
8  
9

10 It is an extremely challenging task for dispatchers to identify ACS over the telephone as there  
11 are so many different causes of chest pain (11, 19, 20), and there is very limited information  
12 available at the time of the initial phone call. It has previously been reported that only 1 out  
13 of 18 patients who request an ambulance for a complaint of chest pain has ACS(3). While a  
14 validated prediction model would have clear benefits, this systematic review has identified no  
15 validated tools that could be used in current practice.  
16  
17  
18  
19  
20  
21  
22  
23  
24  
25

26 It has also been reported that the AMPDS triage system is not an accurate tool for identifying  
27 ACS patients (3). Moreover, in Denmark, Criteria-based Danish index is used to triage  
28 emergency calls and it resulted in over triage for 51% of chest pain calls as they were  
29 discharged without specific diagnosis and AMI were only found in 11% of chest pain calls  
30 (2). Dispatch triage systems were constructed to prioritize patient's condition and ambulance  
31 response grade and it were not developed for diagnosis. Therefore, it important to highlight  
32 that the use of prediction models would enhance ACS detection by looking into different  
33 symptoms associated with ACS.  
34  
35  
36  
37  
38  
39  
40  
41  
42  
43  
44  
45  
46

47 It is clear that chest pain is a main symptom of ACS (2, 11, 19, 21-23). However, previous  
48 studies have shown that some ACS patients has been given lower priority during triage due to  
49 not having chest pain (3, 24). Deakin *et al* found that 13% of patients who called for an  
50 ambulance with confirmed ACS presented with no chest pain A study was conducted in  
51 Australia by Linda *et al* (25) to identify the sex differences in symptoms related to MI  
52 reported to EMS dispatch agrees with Deakin *et al* (3) and our findings that chest pain alone  
53  
54  
55  
56  
57  
58  
59  
60

1  
2  
3 is not a solid predictor of MI. Among female patients who called for an ambulance and were  
4 finally diagnosed with MI only 54.4% presented with chest pain, while among male patients  
5  
6 68.7% had chest pain. As a result, priority 1 allocation for women was 67% and for men 81%  
7  
8 (25). Also, several studies have identified differences of symptoms reported by ACS patients.  
9  
10 Interestingly, as we found in this systematic review, symptoms of ACS differ between male  
11  
12 and female patients (18, 19, 25). One of the studies included in the search developed two  
13  
14 different prediction models for men and women. However, the female prediction model  
15  
16 failed to stand up to internal validation and should not be implemented (18). The most  
17  
18 common symptom with MI following chest pain is Shortness of Breath (SOB) which  
19  
20 appeared in 28.3% women vs 25.8% men. In patients presenting with no chest pain, SOB was  
21  
22 the most common symptom, occurring in 38% women vs 32% men. These findings agree  
23  
24 with what we have found as two studies that nausea, SOB and cold sweat were the most  
25  
26 common symptoms reported after chest pain (16, 17). Women with ACS are less likely to  
27  
28 present with chest pain when compared to men. Therefore, these differences might lead to the  
29  
30 fact that dispatch triage systems can't accurately detect ACS.  
31  
32  
33  
34  
35  
36  
37  
38  
39  
40  
41  
42

### 43 **Future Research:**

44  
45  
46 Future work should focus on deriving and validating for chest pain triage to increase the  
47  
48 sensitivity and specificity for detecting ACS and life-threatening conditions. Prediction  
49  
50 models have shown that it has more accuracy than dispatch system tools. Prediction models  
51  
52 could help in reducing the over triage and increasing the accuracy of detecting ACS and other  
53  
54 life-threatening conditions associated with chest pain which could eventually lead to reduce  
55  
56 over-triage for non life-threatening conditions, and EDs crowding.  
57  
58  
59  
60



**Patient and Public Involvement:**

No Patient involved.

**Funds:**

The publication fee is funded by the cardiovascular department, University of Manchester, UK. No grant or award number.

**Limitations:**

It is possible that some relevant papers were missed because we only included studies that have adult participants who are >18 years old and we excluded papers not published in English language. Unfortunately, we couldn't conduct a meta-analysis as there was variations between dispatch system tools and priority types. Also, there was a difference in the definition of life-threatening conditions definition between included studies.

**Conclusion:**

EMS dispatch systems accuracy for ACS and life-threatening conditions associated with chest pain is good. Since the dispatch tools were built to triage ambulance response priority based on sign and symptoms, this led to over triage among non life-threatening chest pain patients. Over triage were slightly reduced by deriving different prediction models and showed better sensitivity.

**Table 1: Characteristics of included studies.**

| Study ID                    | Year | Country                      | Study design                          | Sites | Study period                        |
|-----------------------------|------|------------------------------|---------------------------------------|-------|-------------------------------------|
| Gellerstedt, et al.<br>(16) | 2006 | Municipality<br>of Go'teborg | Prospective cohort study              | 1     | 3 months                            |
| Reuter, et al. (18)         | 2019 | France                       | Follow-up prospective<br>cohort study | 1     | 18 months May 2010-<br>Nov 2011     |
| Gellerstedt, et al.<br>(17) | 2016 | Sweden                       | Retrospective cohort study            | 1     | 7 months 1 may<br>2009- 28 Feb 2010 |

**Table 2: Study and patient characteristics of all studies included in the systematic review.**

| Study ID                 | N    | Population                                                                                        | Triage criteria                                                   | Exclusion criteria                                                        | Target condition                 | Study weaknesses                                                                                                                                            |
|--------------------------|------|---------------------------------------------------------------------------------------------------|-------------------------------------------------------------------|---------------------------------------------------------------------------|----------------------------------|-------------------------------------------------------------------------------------------------------------------------------------------------------------|
| Gellerstedt, et al. (16) | 503  | Patients who called for an ambulance and who were assessed by the dispatcher as having chest pain | Dispatcher judgement vs prediction model (derived in this cohort) | NA                                                                        | AMI, Life-Threatening Conditions | Retrospective, no sample size calculation, small simple size, out of date AMI reference standard (based on creatine kinase-MB rather than cardiac troponin) |
| Reuter, et al. (18)      | 3727 | Adult 18 old called for ambulance chest pain with final diagnosis.                                | Prediction model                                                  | Difficult communication, language barrier inability to speak with patient | ACS                              | Information bias, unclear how AMI was adjudicated.                                                                                                          |
| Gellerstedt, et al. (17) | 1942 | Patients who called 112 for an emergency                                                          | Dispatcher judgement vs                                           | Lost diagnosis, or follow up.                                             | ACS, Life-Threatening Conditions | 95% CIs for test characteristics were not                                                                                                                   |

1  
2  
3  
4  
5  
6  
7  
8  
9  
10  
11  
12  
13  
14  
15  
16  
17  
18  
19  
20  
21  
22  
23  
24  
25  
26  
27  
28  
29  
30  
31  
32  
33  
34  
35  
36  
37  
38  
39  
40  
41  
42  
43  
44  
45  
46  
47  
48  
49  
50  
51  
52  
53  
54  
55  
56  
57  
58  
59  
60

|  |  |                                                |                     |  |  |                                                                                                                             |
|--|--|------------------------------------------------|---------------------|--|--|-----------------------------------------------------------------------------------------------------------------------------|
|  |  | ambulance with a<br>complaint of chest<br>pain | prediction<br>model |  |  | presented. Only<br>internal validation<br>completed, and<br>the full results of<br>that validation<br>were not<br>presented |
|--|--|------------------------------------------------|---------------------|--|--|-----------------------------------------------------------------------------------------------------------------------------|

ACS: Acute Coronary Syndrome; AMI: Acute Myocardial Infraction; CI: Confidence Interval; NA: Not Available.

For peer review only

**Table 3: Diagnostic accuracy of dispatch tools and prediction models for ACS.**

| ID                       | N    | Triage criteria                 | Sensitivity % | Specificity % | NPV % | PPV % | TP % | FP % | FN % | TN % |
|--------------------------|------|---------------------------------|---------------|---------------|-------|-------|------|------|------|------|
| Gellerstedt, et al. (16) | 503  | Dispatch system (standard care) | 85.7%         | 26.9%         | 87.7  | 32.0  | 90   | 291  | 15   | 107  |
|                          | 503  | Prediction model                | 92.4%         | 28.6%         | 93.4  | 25.5  | 97   | 284  | 8    | 114  |
| Reuter, et al. (18)      | 3727 | Male Prediction model           | NA            | NA            | NA    | NA    | NA   | NA   | NA   | NA   |
|                          | 1824 | Female Prediction model         | NA            | NA            | NA    | NA    | NA   | NA   | NA   | NA   |
| Gellerstedt, et al. (17) | 1942 | Dispatch system                 | 82.6          | 39.9          | 94.3  | 15.9  | 194  | 1026 | 41   | 681  |
|                          | 1942 | Full Prediction model           | 90.2          | 40.9          | 96.8  | 17.4  | 212  | 1008 | 23   | 699  |
|                          | 1942 | Limited Prediction model        | 91.1          | 41.1          | 96.9  | 17.5  | 214  | 1006 | 22   | 701  |

**Table 4: Diagnostic accuracy of dispatch tools and prediction models for life-threatening conditions.**

| ID                          | N    | Triage criteria          | Sensitivity % | Specificity % | NPV % | PPV % | TP % | FP % | FN % | TN % |
|-----------------------------|------|--------------------------|---------------|---------------|-------|-------|------|------|------|------|
| Gellerstedt, et al.<br>(16) | 493  | Dispatch system          | 80.9          | 37.5          | 64.1  | 47.3  | 178  | 198  | 42   | 75   |
|                             | 493  | Prediction model         | 86.4          | 31.8          | 74.4  | 50.5  | 190  | 186  | 30   | 87   |
| Gellerstedt, et al.<br>(17) | 1944 | Dispatch system          | 76.5          | 39.8          | 89.9  | 19.5  | 238  | 983  | 73   | 650  |
|                             | 1944 | Full Prediction model    | 88.4          | 42.1          | 95    | 22.5  | 275  | 946  | 36   | 687  |
|                             | 1944 | Limited Prediction model | 88.7          | 42.1          | 95.1  | 22.6  | 276  | 945  | 35   | 688  |

1  
2  
3  
4  
5  
6  
7  
8 **Figure 1: Flow diagram of study selection**  
9

10 **Figure 2: QUADAS-2 assessment of eligible studies**  
11  
12  
13  
14

15 **References:**  
16  
17  
18

- 19 1. Ezekowitz JA, Welsh RC, Weiss D, Chan M, Keeble W, Khadour F, et al. Providing  
20 Rapid Out of Hospital Acute Cardiovascular Treatment 4 (PROACT-4). *J Am Heart Assoc.*  
21 2015;4(12).
- 22 2. Pedersen CK, Stengaard C, Friesgaard K, Dodt KK, Søndergaard HM, Terkelsen CJ,  
23 et al. Chest pain in the ambulance; prevalence, causes and outcome - a retrospective cohort  
24 study. *Scandinavian Journal of Trauma, Resuscitation and Emergency Medicine.*  
25 2019;27(1):84.
- 26 3. Deakin CD, Sherwood DM, Smith A, Cassidy M. Does telephone triage of emergency  
27 (999) calls using Advanced Medical Priority Dispatch (AMPDS) with Department of Health  
28 (DH) call prioritisation effectively identify patients with an acute coronary syndrome? An  
29 audit of 42,657 emergency calls to Hampshire Ambulance Service NHS Trust. *Emergency*  
30 *medicine journal : EMJ.* 2006;23(3):232-5.
- 31 4. Durham M, Faulkner M, Deakin C. Targeted response? An exploration of why  
32 ambulance services find government targets particularly challenging. *British Medical*  
33 *Bulletin.* 2016;120(1):35-42.
- 34 5. Janette Turner RJ, Annabel Crum, Joanne Coster, Tony Stone, Jone Nicholl.  
35 *Ambulance Response Programme.* 2017.
- 36 6. Bohm K, Kurland L. The accuracy of medical dispatch - a systematic review.  
37 *Scandinavian journal of trauma, resuscitation and emergency medicine.* 2018;26(1):94-.
- 38 7. Lidal IB, Holte HH, Vist GE. Triage systems for pre-hospital emergency medical  
39 services - a systematic review. *Scandinavian Journal of Trauma, Resuscitation and*  
40 *Emergency Medicine.* 2013;21(1):28.
- 41 8. Hoikka M, Länkimäki S, Silfvast T, Ala-Kokko TI. Medical priority dispatch codes—  
42 comparison with National Early Warning Score. *Scandinavian Journal of Trauma,*  
43 *Resuscitation and Emergency Medicine.* 2016;24(1):142.
- 44 9. Dami F, Golay C, Pasquier M, Fuchs V, Carron P-N, Hugli O. Prehospital triage  
45 accuracy in a criteria based dispatch centre. *BMC emergency medicine.* 2015;15:32-.
- 46 10. Torlén K, Kurland L, Castrén M, Olanders K, Bohm K. A comparison of two  
47 emergency medical dispatch protocols with respect to accuracy. *Scandinavian Journal of*  
48 *Trauma, Resuscitation and Emergency Medicine.* 2017;25(1):122.
- 49 11. Colbeck M. Paramedic diagnosis of acute coronary syndrome in the out-of-hospital  
50 patient with acute, non-traumatic chest pain. *Australasian Journal of Paramedicine.*  
51 2016;13(4).
- 52 12. Moher D, Liberati A, Tetzlaff J, Altman DG. Preferred reporting items for systematic  
53 reviews and meta-analyses: the PRISMA statement. *J Clin Epidemiol.* 2009;62(10):1006-12.  
54  
55  
56  
57  
58  
59  
60

13. Thygesen K, Alpert JS, Jaffe AS, Chaitman BR, Bax JJ, Morrow DA, et al. Fourth universal definition of myocardial infarction (2018). *Eur Heart J*. 2019;40(3):237-69.
14. Yusuf SW. Unstable Angina. *BMJ Best Practice*. 2018.
15. Whiting PF, Rutjes AWS, Westwood ME, Mallett S, Deeks JJ, Reitsma JB, et al. QUADAS-2: A Revised Tool for the Quality Assessment of Diagnostic Accuracy Studies. *Annals of Internal Medicine*. 2011;155(8):529-36.
16. Gellerstedt M, Bang A, Herlitz J. Could a computer-based system including a prevalence function support emergency medical systems and improve the allocation of life support level? *Eur J Emerg Med*. 2006;13(5):290-4.
17. Gellerstedt M, Rawshani N, Herlitz J, Bång A, Gelang C, Andersson J-O, et al. Could prioritisation by emergency medicine dispatchers be improved by using computer-based decision support? A cohort of patients with chest pain. *International Journal of Cardiology*. 2016;220:734-8.
18. Reuter P-G, Pradeau C, Huo Yung Kai S, Lhermusier T, Bourdé A, Tentillier E, et al. Predicting acute coronary syndrome in males and females with chest pain who call an emergency medical communication centre. *Scandinavian Journal of Trauma, Resuscitation and Emergency Medicine*. 2019;27(1):92.
19. Wouters LT, Zwart DL, Erkelens DC, Cheung NS, de Groot E, Damoiseaux RA, et al. Chest discomfort at night and risk of acute coronary syndrome: cross-sectional study of telephone conversations. *Family Practice*. 2020.
20. Kelly A-M. The FAMOUS TRIAGE trial: Pre-hospital chest pain research challenging the paradigm. *Emergency Medicine Australasia*. 2018;30(4):594-.
21. Alghamdi A, Howard L, Reynard C, Moss P, Jarman H, Mackway-Jones K, et al. Enhanced triage for patients with suspected cardiac chest pain: the History and Electrocardiogram-only Manchester Acute Coronary Syndromes decision aid. *European Journal of Emergency Medicine*. 2019;26(5):356-61.
22. Sax DR, Vinson DR, Yamin CK, Huang J, Falck TM, Bhargava R, et al. Tele-Triage Outcomes For Patients With Chest Pain: Comparing Physicians And Registered Nurses. *Health Affairs*. 2018;37(12):1997-2004.
23. Svensson L, Isaksson L, Axelsson C, Nordlander R, Herlitz J. Predictors of myocardial damage prior to hospital admission among patients with acute chest pain or other symptoms raising a suspicion of acute coronary syndrome. *Coron Artery Dis*. 2003;14(3):225-31.
24. Herlitz J, Starke M, Hansson E, Ringvall E, Karlson BW, Waagstein L. Early identification of patients with an acute coronary syndrome as assessed by dispatchers and the ambulance crew. *The American Journal of Emergency Medicine*. 2002;20(3):196-201.
25. Coventry LL, Bremner AP, Jacobs IG, Finn J. Myocardial Infarction: Sex Differences in Symptoms Reported to Emergency Dispatch. *Prehospital Emergency Care*. 2013;17(2):193-202.



1  
2  
3  
4  
5  
6  
7  
8  
9  
10  
11  
12  
13  
14  
15  
16  
17  
18  
19  
20  
21  
22  
23  
24  
25  
26  
27  
28  
29  
30  
31  
32  
33  
34  
35  
36  
37  
38  
39  
40  
41  
42  
43  
44  
45  
46  
47  
48  
49  
50  
51  
52  
53  
54  
55  
56  
57  
58  
59  
60

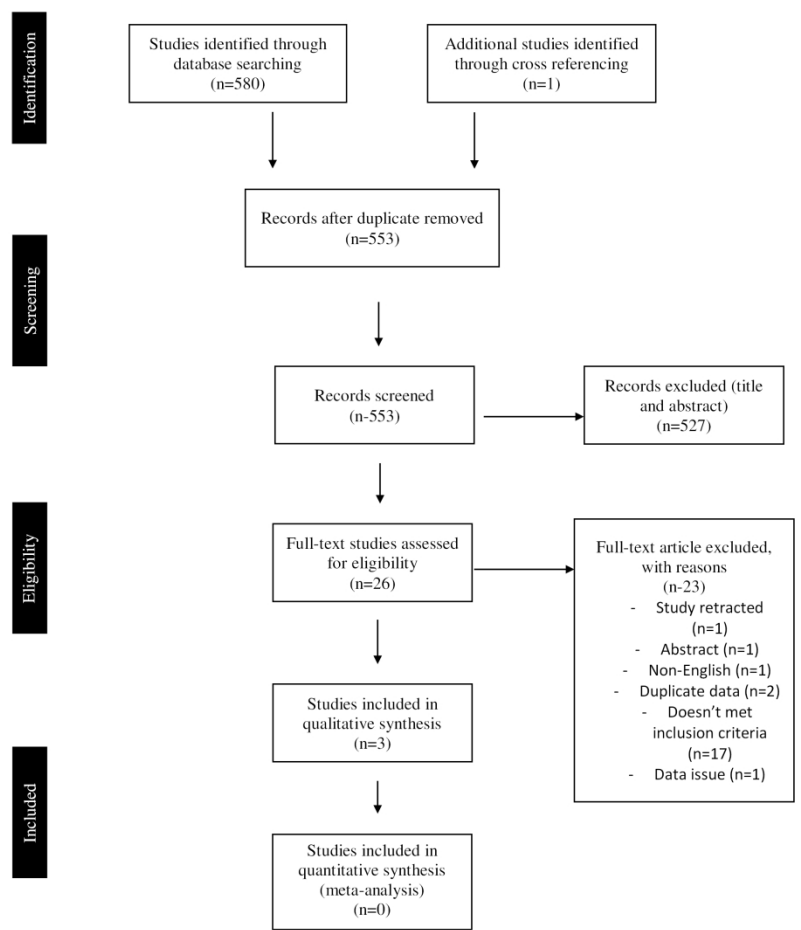

Figure 1: Flow diagram of study selection

209x297mm (300 x 300 DPI)

1  
2  
3  
4  
5  
6  
7  
8  
9  
10  
11  
12  
13  
14  
15  
16  
17  
18  
19  
20  
21  
22  
23  
24  
25  
26  
27  
28  
29  
30  
31  
32  
33  
34  
35  
36  
37  
38  
39  
40  
41  
42  
43  
44  
45  
46  
47  
48  
49  
50  
51  
52  
53  
54  
55  
56  
57  
58  
59  
60

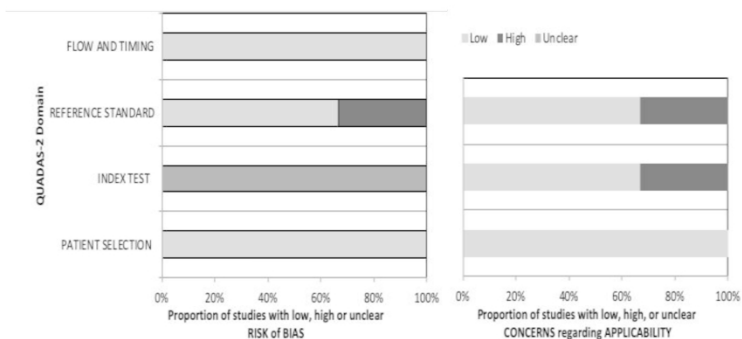

Figure 2: QUADAS-2 assessment of eligible studies

209x297mm (300 x 300 DPI)

| Study                                                        | Reason for exclusion                                                                                       |
|--------------------------------------------------------------|------------------------------------------------------------------------------------------------------------|
| (Deakin et al. 2006)                                         | Included all medical (non-chest pain) calls as TN.                                                         |
| (Scott et al. 2017)                                          | The authors didn't provide details on dispatch priority or sensitivity of triage accuracy.                 |
| (Herlitz et al. 2002)                                        | Population Included based on any symptom that raise suspicion of AMI.                                      |
| (Rawshani et al. 2017)                                       | Duplicate data.                                                                                            |
| (Grzybowski et al. 2000)                                     | No dispatch triage priority or sensitivity of triage accuracy.                                             |
| (Plat et al. 2018)                                           | Included all medical calls not only chest pain.                                                            |
| (Ball et al. 2016)                                           | Included all medical and trauma calls.                                                                     |
| (Sporer et al. 2008)                                         | Included all patients transported by ambulance.                                                            |
| (Andersen et al. 2016)                                       | included chronic diseases patients.                                                                        |
| (Wouters et al. 2020)                                        | Included patients called out of hours primary care not the emergency medical services.                     |
| (Rawshani et al. 2016)                                       | Duplicate data.                                                                                            |
| (Sørensen et al. 2013)                                       | Included patients based on ECG findings                                                                    |
| (Thakore, McGugan, and Morrison 2002; Braunwald et al. 2002) | Included medical and trauma conditions.                                                                    |
| (Higgins et al. 1993)                                        | Included patients who arrived to ED only.                                                                  |
| (Nehme, Andrew, and Smith 2016)                              | Measuring response time to time critical emergencies with no final diagnosis.                              |
| (Clawson et al. 2018)                                        | Included AMI confirmed cases only and didn't provide non-cardiac chest pain to measure accuracy.           |
| (Sporer and Wilson 2013)                                     | Measured triage for accurately sending ALS or BLS team for drug administration.                            |
| (Adams et al. 2010)                                          | No dispatch triage. Prioritizing patients based on ECG findings.                                           |
| (Manzo-Silberman et al. 2015)                                | Calls collected from general practitioner and EMS dispatch with no linkage of priority to final diagnosis. |
| (Pedersen et al. 2019)                                       | No dispatch priority assigned to the final diagnosis.                                                      |
| (Carmen Martín-Castro 2001)                                  | Non-English.                                                                                               |
| (Pandey and Khandekar 2009)                                  | Article retracted due to data issue.                                                                       |
| (Bhargava et al. 2012)                                       | Abstract.                                                                                                  |

## Reference list:

- Adams, R., Y. Appelman, J. G. Bronzwaer, T. Slagboom, G. Amoroso, P. van Exter, G. P. Tijssen, and R. J. de Winter. 2010. 'Implementation of a prehospital triage system for patients with chest pain and logistics for primary percutaneous coronary intervention in the region of Amsterdam, the Netherlands', *Am J Cardiol*, 106: 931-5.
- Andersen, M. S., E. F. Christensen, S. B. Jepsen, J. Nørtved, J. B. Hansen, and S. P. Johnsen. 2016. 'Can public health registry data improve Emergency Medical Dispatch?', *Acta Anaesthesiologica Scandinavica*, 60: 370-79.
- Ball, S. J., T. A. Williams, K. Smith, P. Cameron, D. Fatovich, K. L. O'Halloran, D. Hendrie, A. Whiteside, M. Inoue, D. Brink, I. Langridge, G. Pereira, H. Tohira, S. Chinnery, J. E. Bray, P. Bailey, and J. Finn. 2016. 'Association between ambulance dispatch priority and patient condition', *Emerg Med Australas*, 28: 716-24.
- Bhargava, Reena, L. Temkin Tanya, Bruce Fireman, Eleanor Levin, and Debbie Amaral. 2012. 'Abstract 17664: Outcomes of Chest Pain Calls to an Advice and Appointment Call Center', *Circulation*, 126: A17664-A64.
- Braunwald, E., E. M. Antman, J. W. Beasley, R. M. Califf, M. D. Cheitlin, J. S. Hochman, R. H. Jones, D. Kereiakes, J. Kupersmith, T. N. Levin, C. J. Pepine, J. W. Schaeffer, E. E. Smith, 3rd, D. E. Steward, P. Theroux, R. J. Gibbons, J. S. Alpert, D. P. Faxon, V. Fuster, G. Gregoratos, L. F. Hiratzka, A. K. Jacobs, and S. C. Smith, Jr. 2002. 'ACC/AHA 2002 guideline update for the management of patients with unstable angina and non-ST-segment elevation myocardial infarction--summary article: a report of the American College of Cardiology/American Heart Association task force on practice guidelines (Committee on the Management of Patients With Unstable Angina)', *J Am Coll Cardiol*, 40: 1366-74.
- Carmen Martín-Castro, Pilar Navarro-Pérez, Gabriel Jiménez-Moral, Ramón Caraballo-Daza, J. Manuel Martín-Vázquez less. 2001. 'Validación de un protocolo telefónico para cardiopatía isquémica en emergencias sanitarias', *elsevier*
- Clawson, J. J., I. Gardett, G. Scott, C. Fivaz, T. Barron, M. Broadbent, and C. Olola. 2018. 'Hospital-Confirmed Acute Myocardial Infarction: Prehospital Identification Using the Medical Priority Dispatch System', *Prehosp Disaster Med*, 33: 29-35.
- Deakin, C. D., D. M. Sherwood, A. Smith, and M. Cassidy. 2006. 'Does telephone triage of emergency (999) calls using Advanced Medical Priority Dispatch (AMPDS) with Department of Health (DH) call prioritisation effectively identify patients with an acute coronary syndrome? An audit of 42,657 emergency calls to Hampshire Ambulance Service NHS Trust', *Emergency medicine journal : EMJ*, 23: 232-35.
- Grzybowski, M., R. J. Zalenski, M. A. Ross, and B. Bock. 2000. 'A prediction model for prehospital triage of patients with suspected cardiac ischemia', *J Electrocardiol*, 33 Suppl: 253-8.
- Herlitz, Johan, Mia Starke, Elisabeth Hansson, Eva Ringvall, Björn W. Karlson, and Lisbeth Waagstein. 2002. 'Early identification of patients with an acute coronary syndrome as assessed by dispatchers and the ambulance crew', *The American Journal of Emergency Medicine*, 20: 196-201.
- Higgins, G. L., 3rd, C. T. Lambrew, E. Hunt, K. L. Wallace, M. W. Foure, J. R. Shryock, and D. L. Redfield. 1993. 'Expediting the early hospital care of the adult patient with

- 1  
2  
3 nontraumatic chest pain: impact of a modified ED triage protocol', *Am J Emerg Med*,  
4 11: 576-82.  
5  
6 Manzo-Silberman, S., N. Assez, B. Vivien, K. Tazarourte, T. Mokni, V. Bounes, A. Greffet, V.  
7 Bataille, G. Mulak, P. Goldstein, J. L. Ducassé, C. Spaulding, and S. Charpentier. 2015.  
8 'Management of non-traumatic chest pain by the French Emergency Medical  
9 System: Insights from the DOLORES registry', *Arch Cardiovasc Dis*, 108: 181-8.  
10  
11 Nehme, Ziad, Emily Andrew, and Karen Smith. 2016. 'Factors Influencing the Timeliness of  
12 Emergency Medical Service Response to Time Critical Emergencies', *Prehospital  
13 Emergency Care*, 20: 783-91.  
14  
15 Pandey, Anurag, and Rajiv B. Khandekar. 2009. "Evaluating The Effectiveness Of Telephone  
16 Triage For Priority Emergency Ambulance Dispatch." In.  
17  
18 Pedersen, Claus Kjær, Carsten Stengaard, Kristian Friesgaard, Karen Kaae Dodt, Hanne  
19 Maare Søndergaard, Christian Juhl Terkelsen, and Morten Thingemann Bøtker. 2019.  
20 'Chest pain in the ambulance; prevalence, causes and outcome - a retrospective  
21 cohort study', *Scandinavian Journal of Trauma, Resuscitation and Emergency  
22 Medicine*, 27: 84.  
23  
24 Plat, F. M., Y. A. S. Peters, F. J. Loots, C. J. A. de Groot, T. Eckhardt, E. Keizer, and P. Giesen.  
25 2018. 'Ambulance dispatch versus general practitioner home visit for highly urgent  
26 out-of-hours primary care', *Fam Pract*, 35: 440-45.  
27  
28 Rawshani, A., N. Rawshani, C. Gelang, J. O. Andersson, A. Larsson, A. Bång, J. Herlitz, and M.  
29 Gellerstedt. 2017. 'Emergency medical dispatch priority in chest pain patients due to  
30 life threatening conditions: A cohort study examining circadian variations and impact  
31 of the education', *Int J Cardiol*, 236: 43-48.  
32  
33 Rawshani, Nina, Araz Rawshani, Carita Gelang, Johan Herlitz, Angela Bång, Jan-Otto  
34 Andersson, and Martin Gellerstedt. 2016. 'Could ten questions asked by the dispatch  
35 center predict the outcome for patients with chest discomfort?', *International  
36 Journal of Cardiology*, 209: 223-25.  
37  
38 Scott, Greg, Jeff J. Clawson, Isabel Gardett, Meghan Broadbent, Nathan Williams, Conrad  
39 Fivaz, Gigi Marshall, Tracey Barron, and Christopher Olola. 2017. '9-1-1 Triage of  
40 Non-Traumatic Chest Pain: Association with Hospital Diagnosis', *Prehospital  
41 emergency care : official journal of the National Association of EMS Physicians and  
42 the National Association of State EMS Directors*, 21: 525-34.  
43  
44 Sørensen, Jacob Thorsted, Carsten Stengaard, Christina Ankjær Sørensen, Kristian Thygesen,  
45 Hans Erik Bøtker, Leif Thuesen, and Christian Juhl Terkelsen. 2013. 'Diagnosis and  
46 outcome in a prehospital cohort of patients with bundle branch block and suspected  
47 acute myocardial infarction', *European heart journal. Acute cardiovascular care*, 2:  
48 176-81.  
49  
50 Sporer, K. A., N. J. Johnson, C. C. Yeh, and G. M. Youngblood. 2008. 'Can emergency medical  
51 dispatch codes predict prehospital interventions for common 9-1-1 call types?',  
52 *Prehosp Emerg Care*, 12: 470-8.  
53  
54 Sporer, Karl A., and Keith G. Wilson. 2013. 'How Well Do Emergency Medical Dispatch Codes  
55 Predict Prehospital Medication Administration in a Diverse Urban Community?', *The  
56 Journal of Emergency Medicine*, 44: 413-22.e3.  
57  
58 Thakore, S., E. A. McGugan, and W. Morrison. 2002. 'Emergency ambulance dispatch: is  
59 there a case for triage?', *J R Soc Med*, 95: 126-9.  
60  
61 Wouters, Loes T., Dorien L. Zwart, Daphne C. Erkelens, Noël S. Cheung, Esther de Groot,  
62 Roger A. Damoiseaux, Arno W. Hoes, and Frans H. Rutten. 2020. 'Chest discomfort at

1  
2  
3 night and risk of acute coronary syndrome: cross-sectional study of telephone  
4 conversations', *Family Practice*.  
5  
6  
7  
8  
9  
10  
11  
12  
13  
14  
15  
16  
17  
18  
19  
20  
21  
22  
23  
24  
25  
26  
27  
28  
29  
30  
31  
32  
33  
34  
35  
36  
37  
38  
39  
40  
41  
42  
43  
44  
45  
46  
47  
48  
49  
50  
51  
52  
53  
54  
55  
56  
57  
58  
59  
60

For peer review only

# Supplementary Appendix

---

## Customised QUADAS-2 tool for telephone triage in chest pain systematic review

### Domain 1: Patient selection

#### A. Risk of bias

- |                                                             |                      |
|-------------------------------------------------------------|----------------------|
| a. Was a consecutive or random sample of patients enrolled? | Yes / No / Unclear   |
| b. Did the study avoid inappropriate exclusions?            | Yes / No / Unclear   |
| Could the selection of patients have introduced bias?       | Low / High / Unclear |

#### B. Concerns regarding applicability

- |                                                                           |                      |
|---------------------------------------------------------------------------|----------------------|
| Is there concern that included patients do not match the review question? | Low / High / Unclear |
|---------------------------------------------------------------------------|----------------------|

### OVERALL:

LOW: Patients who call 999, 911, 112, 108 or another number for emergency medical attention with a primary complaint of chest pain

HIGH: Selection of a specific high- or low-risk population; setting is not an emergency telephone consultation; convenience sampling with clear potential for systematic selection bias

UNCLEAR: Insufficient information to determine the risk of bias.

1  
2  
3  
4  
5  
6 **Domain 2: Telephone triage intervention**  
7

8 **A. Risk of bias**

9 a. Was the outcome of telephone triage interpreted without knowledge of the outcome? Yes / No / Unclear

10 b. Is it unlikely that the telephone triage introduced biased risk group allocation? Yes / No / Unclear

11  
12 Could the scoring or interpretation of the telephone triage have introduced bias? Low / High / Unclear  
13  
14

15  
16 **B. Concerns regarding applicability**

17 Is there concern that the telephone triage, its conduct, or interpretation Low / High / Unclear  
18 differ from the review question?  
19  
20

21 **OVERALL:**  
22  
23

24 LOW: Telephone triage outcome calculated prospectively by treating clinicians, blinded to patient outcome.

25  
26 HIGH: Telephone triage outcome calculated without blinding to outcome. Retrospective calculation of telephone triage outcome.

27  
28 UNCLEAR: Insufficient information.  
29  
30  
31  
32  
33  
34  
35  
36  
37  
38  
39  
40  
41  
42  
43  
44  
45  
46  
47



1  
2  
3  
4 **Domain 3: AMI/serious adverse event allocation**  
5

6 **A. Risk of bias**

- 7 a. Was the universal definition of AMI used to define the reference standard? Yes / No / Unclear  
8 b. Was the reference standard adjudicated without knowledge of the telephone triage? Yes / No / Unclear  
9

10 Could the reference standard, its conduct, or its interpretation have introduced bias? Low / High / Unclear  
11  
12  
13

14 **B. Concerns regarding applicability**

15 Is there concern that the target condition as defined by the reference standard Low / High / Unclear  
16 does not match the review question?  
17  
18  
19  
20

21 **OVERALL:**  
22  
23

24 LOW: All patients underwent reference standard investigations for AMI including troponin sampling. The diagnosis of AMI was adjudicated by at least two  
25 investigators who were blinded to the telephone triage outcome. Serious adverse events include death (all cause), aortic dissection, pulmonary embolism and  
26 tension pneumothorax  
27

28  
29 HIGH: Outdated definition for AMI or definition inconsistent with the universal definition. The definition of serious adverse events does not include one of the  
30 core components specified above. Follow up procedure raises significant concerns about the possibility of missed events (e.g. chart review at a single centre  
31 without some assurance that this method would capture all relevant events).  
32

33  
34 UNCLEAR: Insufficient information.  
35  
36  
37  
38  
39  
40  
41  
42  
43  
44

1  
2  
3  
4 **Domain 4: Flow and timing**  
5

6 **A. Risk of bias**

- 7 a. Did all included patients receive an appropriate reference standard? Yes / No / Unclear  
8 b. Did patients receive the same reference standard? Yes / No / Unclear  
9 c. Follow-up procedure was sufficiently long to not miss relevant adverse events? Yes / No / Unclear  
10 d. Did no significant loss to follow up/exclusion due to incomplete records occur? Yes / No / Unclear  
11

12  
13 Could the patient flow have introduced bias? Low / High / Unclear  
14  
15

16  
17 LOW: All patients underwent reference standard investigations for AMI including troponin sampling. Patients were followed up through their subsequent  
18 inpatient course or for at least 7 days.  
19

20 HIGH: Not all patients were subjected to appropriate reference standard investigations including troponin sampling.  
21

22 UNCLEAR: Insufficient information. This option includes lack of detail about troponin testing and the follow up procedure.  
23  
24  
25  
26  
27  
28  
29  
30  
31  
32  
33  
34  
35  
36  
37  
38  
39  
40  
41  
42  
43  
44  
45  
46  
47



For peer review only

1  
2  
3  
4  
5  
6  
7  
8  
9  
10  
11  
12  
13  
14  
15  
16  
17  
18  
19  
20  
21  
22  
23  
24  
25  
26  
27  
28  
29  
30  
31  
32  
33  
34  
35  
36  
37  
38  
39  
40  
41  
42  
43  
44  
45  
46  
47

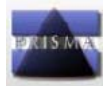

# PRISMA 2009 Checklist

| Section/topic                      | #  | Checklist item                                                                                                                                                                                                                                                                                              | Reported on page # |
|------------------------------------|----|-------------------------------------------------------------------------------------------------------------------------------------------------------------------------------------------------------------------------------------------------------------------------------------------------------------|--------------------|
| <b>TITLE</b>                       |    |                                                                                                                                                                                                                                                                                                             |                    |
| Title                              | 1  | Identify the report as a systematic review, meta-analysis, or both.                                                                                                                                                                                                                                         | 1                  |
| <b>ABSTRACT</b>                    |    |                                                                                                                                                                                                                                                                                                             |                    |
| Structured summary                 | 2  | Provide a structured summary including, as applicable: background; objectives; data sources; study eligibility criteria, participants, and interventions; study appraisal and synthesis methods; results; limitations; conclusions and implications of key findings; systematic review registration number. | 2-3                |
| <b>INTRODUCTION</b>                |    |                                                                                                                                                                                                                                                                                                             |                    |
| Rationale                          | 3  | Describe the rationale for the review in the context of what is already known.                                                                                                                                                                                                                              | 5-6                |
| Objectives                         | 4  | Provide an explicit statement of questions being addressed with reference to participants, interventions, comparisons, outcomes, and study design (PICOS).                                                                                                                                                  | 7                  |
| <b>METHODS</b>                     |    |                                                                                                                                                                                                                                                                                                             |                    |
| Protocol and registration          | 5  | Indicate if a review protocol exists, if and where it can be accessed (e.g., Web address), and, if available, provide registration information including registration number.                                                                                                                               | 6                  |
| Eligibility criteria               | 6  | Specify study characteristics (e.g., PICOS, length of follow-up) and report characteristics (e.g., years considered, language, publication status) used as criteria for eligibility, giving rationale.                                                                                                      | 6-7                |
| Information sources                | 7  | Describe all information sources (e.g., databases with dates of coverage, contact with study authors to identify additional studies) in the search and date last searched.                                                                                                                                  | 6                  |
| Search                             | 8  | Present full electronic search strategy for at least one database, including any limits used, such that it could be repeated.                                                                                                                                                                               | 6                  |
| Study selection                    | 9  | State the process for selecting studies (i.e., screening, eligibility, included in systematic review, and, if applicable, included in the meta-analysis).                                                                                                                                                   | 6-7                |
| Data collection process            | 10 | Describe method of data extraction from reports (e.g., piloted forms, independently, in duplicate) and any processes for obtaining and confirming data from investigators.                                                                                                                                  | 7-8                |
| Data items                         | 11 | List and define all variables for which data were sought (e.g., PICOS, funding sources) and any assumptions and simplifications made.                                                                                                                                                                       | 7                  |
| Risk of bias in individual studies | 12 | Describe methods used for assessing risk of bias of individual studies (including specification of whether this was done at the study or outcome level), and how this information is to be used in any data synthesis.                                                                                      | 7,8                |
| Summary measures                   | 13 | State the principal summary measures (e.g., risk ratio, difference in means).                                                                                                                                                                                                                               | 7                  |
| Synthesis of results               | 14 | Describe the methods of handling data and combining results of studies, if done, including measures of consistency (e.g., $I^2$ ) for each meta-analysis.                                                                                                                                                   | 8                  |

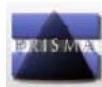

# PRISMA 2009 Checklist

| Section/topic                 | #  | Checklist item                                                                                                                                                                                           | Reported on page # |
|-------------------------------|----|----------------------------------------------------------------------------------------------------------------------------------------------------------------------------------------------------------|--------------------|
| Risk of bias across studies   | 15 | Specify any assessment of risk of bias that may affect the cumulative evidence (e.g., publication bias, selective reporting within studies).                                                             | 7                  |
| Additional analyses           | 16 | Describe methods of additional analyses (e.g., sensitivity or subgroup analyses, meta-regression), if done, indicating which were pre-specified.                                                         | 8                  |
| <b>RESULTS</b>                |    |                                                                                                                                                                                                          |                    |
| Study selection               | 17 | Give numbers of studies screened, assessed for eligibility, and included in the review, with reasons for exclusions at each stage, ideally with a flow diagram.                                          | Figure 1           |
| Study characteristics         | 18 | For each study, present characteristics for which data were extracted (e.g., study size, PICOS, follow-up period) and provide the citations.                                                             | Table 1,2          |
| Risk of bias within studies   | 19 | Present data on risk of bias of each study and, if available, any outcome level assessment (see item 12).                                                                                                | 9                  |
| Results of individual studies | 20 | For all outcomes considered (benefits or harms), present, for each study: (a) simple summary data for each intervention group (b) effect estimates and confidence intervals, ideally with a forest plot. | 9                  |
| Synthesis of results          | 21 | Present results of each meta-analysis done, including confidence intervals and measures of consistency.                                                                                                  | 8-11               |
| Risk of bias across studies   | 22 | Present results of any assessment of risk of bias across studies (see Item 15).                                                                                                                          | Figure 2           |
| Additional analysis           | 23 | Give results of additional analyses, if done (e.g., sensitivity or subgroup analyses, meta-regression [see Item 16]).                                                                                    | Tables 3,4         |
| <b>DISCUSSION</b>             |    |                                                                                                                                                                                                          |                    |
| Summary of evidence           | 24 | Summarize the main findings including the strength of evidence for each main outcome; consider their relevance to key groups (e.g., healthcare providers, users, and policy makers).                     | 11-13              |
| Limitations                   | 25 | Discuss limitations at study and outcome level (e.g., risk of bias), and at review-level (e.g., incomplete retrieval of identified research, reporting bias).                                            | 14                 |
| Conclusions                   | 26 | Provide a general interpretation of the results in the context of other evidence, and implications for future research.                                                                                  | 14                 |
| <b>FUNDING</b>                |    |                                                                                                                                                                                                          |                    |
| Funding                       | 27 | Describe sources of funding for the systematic review and other support (e.g., supply of data); role of funders for the systematic review.                                                               | 14                 |

From: Moher D, Liberati A, Tetzlaff J, Altman DG, The PRISMA Group (2009). Preferred Reporting Items for Systematic Reviews and Meta-Analyses: The PRISMA Statement. PLoS Med 6(7): e1000097. doi:10.1371/journal.pmed1000097

For more information, visit: [www.prisma-statement.org](http://www.prisma-statement.org).

# BMJ Open

## Accuracy of emergency medical services (EMS) telephone triage in identifying acute coronary syndrome (ACS) for chest pain patients: A systematic literature review

|                                 |                                                                                                                                                                                                                                                                                                              |
|---------------------------------|--------------------------------------------------------------------------------------------------------------------------------------------------------------------------------------------------------------------------------------------------------------------------------------------------------------|
| Journal:                        | <i>BMJ Open</i>                                                                                                                                                                                                                                                                                              |
| Manuscript ID                   | bmjopen-2020-045815.R1                                                                                                                                                                                                                                                                                       |
| Article Type:                   | Original research                                                                                                                                                                                                                                                                                            |
| Date Submitted by the Author:   | 27-Mar-2021                                                                                                                                                                                                                                                                                                  |
| Complete List of Authors:       | Alotaibi, Ahmed; The University of Manchester, Division of Cardiovascular Sciences<br>alghamdi, abdulrhman; The University of Manchester<br>Reynard, Charles; University of Manchester, Division of Cardiovascular sciences;<br>Body, Richard; University of Manchester, Division of Cardiovascular Sciences |
| <b>Primary Subject Heading</b>: | Emergency medicine                                                                                                                                                                                                                                                                                           |
| Secondary Subject Heading:      | Cardiovascular medicine                                                                                                                                                                                                                                                                                      |
| Keywords:                       | Myocardial infarction < CARDIOLOGY, Coronary heart disease < CARDIOLOGY, ACCIDENT & EMERGENCY MEDICINE                                                                                                                                                                                                       |
|                                 |                                                                                                                                                                                                                                                                                                              |

SCHOLARONE™  
Manuscripts



I, the Submitting Author has the right to grant and does grant on behalf of all authors of the Work (as defined in the below author licence), an exclusive licence and/or a non-exclusive licence for contributions from authors who are: i) UK Crown employees; ii) where BMJ has agreed a CC-BY licence shall apply, and/or iii) in accordance with the terms applicable for US Federal Government officers or employees acting as part of their official duties; on a worldwide, perpetual, irrevocable, royalty-free basis to BMJ Publishing Group Ltd ("BMJ") its licensees and where the relevant Journal is co-owned by BMJ to the co-owners of the Journal, to publish the Work in this journal and any other BMJ products and to exploit all rights, as set out in our [licence](#).

The Submitting Author accepts and understands that any supply made under these terms is made by BMJ to the Submitting Author unless you are acting as an employee on behalf of your employer or a postgraduate student of an affiliated institution which is paying any applicable article publishing charge ("APC") for Open Access articles. Where the Submitting Author wishes to make the Work available on an Open Access basis (and intends to pay the relevant APC), the terms of reuse of such Open Access shall be governed by a Creative Commons licence – details of these licences and which [Creative Commons](#) licence will apply to this Work are set out in our licence referred to above.

Other than as permitted in any relevant BMJ Author's Self Archiving Policies, I confirm this Work has not been accepted for publication elsewhere, is not being considered for publication elsewhere and does not duplicate material already published. I confirm all authors consent to publication of this Work and authorise the granting of this licence.



1  
2  
3  
4 **Accuracy of emergency medical services (EMS) telephone triage in identifying acute**  
5 **coronary syndrome (ACS) for chest pain patients: A systematic literature review**  
6  
7  
8  
9

10  
11 A) Ahmed Alotaibi <sup>(1)(2)</sup>, Abdulrhman Alghamdi <sup>(1)(2)(3)</sup>, Charles Reynard <sup>(1)(4)</sup>, Richard  
12 Body <sup>(1)(4)</sup>  
13

14  
15  
16 B) Ahmed Alotaibi  
17 Division of Cardiovascular Sciences  
18 Core Technology Facility  
19 The University of Manchester  
20 46 Grafton St, Manchester  
21 M13 9WU  
22 United Kingdom  
23 E-mail : [ahmed.alotaibi@postgrad.manchester.ac.uk](mailto:ahmed.alotaibi@postgrad.manchester.ac.uk)  
24  
25  
26  
27  
28

29 C) Ahmed Alotaibi  
30

- 31  
32 1. Division of Cardiovascular Sciences, University of Manchester, Manchester, UK.  
33 2. College of Applied Medical Sciences, King Saud bin Abdulaziz University for Health  
34 Sciences, Riyadh, Saudi Arabia  
35

36  
37 Abdulrhman Alghamdi

- 38 1. Division of Cardiovascular Sciences, University of Manchester, Manchester, UK.  
39 2. College of Applied Medical Sciences, King Saud bin Abdulaziz University for Health  
40 Sciences, Riyadh, Saudi Arabia  
41 3. King Abdullah International Medical Research Center. Riyadh, Saudi Arabia.  
42  
43  
44

45 Charles Reynard

- 46 1. Division of Cardiovascular Sciences, University of Manchester, Manchester, UK.  
47  
48  
49 4. Emergency Department, Manchester University NHS Foundation  
50 Trust, Manchester, UK  
51  
52

53 Richard Body

- 54 1. Division of Cardiovascular Sciences, University of Manchester, Manchester, UK.  
55 4. Emergency Department, Manchester University NHS Foundation  
56 Trust, Manchester, UK  
57  
58  
59

60 D) Pre-hospital, Chest pain, telephone triage, ACS, Life-threatening conditions,

1  
2  
3 E) Words count: 3170  
4  
5  
6

7 **Abstract;**

8  
9 **Objective:**

10 To systematically appraise the available evidence to determine the accuracy of decision aids  
11 for Emergency Medical Services (EMS) telephone triage of patients with chest pain  
12 suspected to be caused by acute coronary syndrome (ACS) or life-threatening conditions.  
13  
14

15  
16  
17 **Design:**

18 Systematic review.  
19

20  
21  
22 **Data sources:**

23 Electronic searches were performed in Embase 1974, Medline 1946, and Cinahl 1937  
24 databases from 03/03/2020 to 04/03/2020.  
25

26  
27  
28 **Eligibility criteria:**

29 The review included all types of original studies that included adult patients (>18 years) who  
30 called EMS with a primary complaint of chest pain and evaluated dispatch triage priority by  
31 telephone. Outcomes of interest were a final diagnosis of ACS, acute myocardial infarction  
32 (AMI), or other life-threatening conditions.  
33  
34

35  
36  
37 **Data extraction and synthesis:**

38 Two authors independently extracted data on study design, population, study period, outcome  
39 and all data for assessment of accuracy, including cross-tabulation of triage priority against  
40 the outcomes of interest. Risk of bias was assessed using the QUADAS-2 assessment tool.  
41  
42

43  
44  
45 **Results:**

46 Searches identified 553 papers, of which three were eligible for inclusion. Those reports  
47 described the evaluation of three different prediction models with variation in the variables  
48  
49  
50  
51  
52

1  
2  
3 used to detect ACS. The overall results showed that dispatch triage tools have good  
4  
5 sensitivity to detect ACS and life-threatening conditions, even though they are used to triage  
6  
7 signs and symptoms rather than diagnosing the patients. On the other hand, prediction models  
8  
9 were built to detect ACS and life-threatening conditions and therefore prediction models  
10  
11 showed better sensitivity and Negative Predictive Value (NPV) than dispatch triage tools.  
12  
13  
14  
15  
16

17 **Conclusion:**

18  
19 We have identified three prediction models for telephone triage of patients with chest pain.  
20  
21 While they have been found to have greater accuracy than standard EMS dispatch systems,  
22  
23 prospective external validation is essential before clinical use is considered.  
24  
25  
26  
27  
28  
29  
30  
31  
32  
33  
34  
35  
36  
37  
38  
39  
40  
41  
42  
43  
44  
45  
46  
47  
48  
49  
50  
51  
52  
53  
54  
55  
56  
57  
58  
59  
60

**Strength and limitations:**

- To our knowledge, this is the first systematic review looking into the accuracy of pre-hospital chest pain telephone triage.
- It is possible that some relevant papers were missed because researchers only included studies that have adult participants who are >18 years old and excluded papers not published in English language.
- Unfortunately, because of the paucity of data for each decision aid, the data were not suitable for meta-analysis.
- Also, there was a difference in the definition of life-threatening conditions definition between included studies.

**Funding:**

The publication fee is funded by the cardiovascular department, University of Manchester, UK. No grant or award number.

**Registration:**

This systematic review was pre-registered on the International prospective register of systematic reviews (PROSPERO) database (reference CRD42020171184)

**Abbreviations list:**

ED: Emergency Department; ACS : Acute Coronary Syndrome; AMI: Acute Myocardial Infarction; ECG: Electrocardiogram; NPV: Negative Predictive Value; QUADAS: Quality Assessment of Diagnostic Accuracy Studies; PPV: Positive Predictive Value;

1  
2  
3 STEMI: ST-Elevation Myocardial Infarction; ACS: Acute Coronary Syndrome; EMS:  
4  
5 Emergency Medical Services  
6  
7  
8  
9

10 **Keywords:**  
11

12 Pre-hospital, Chest pain, telephone triage, Acute Coronary Syndrome.  
13  
14  
15  
16  
17  
18  
19  
20  
21  
22  
23  
24  
25  
26  
27  
28  
29  
30  
31  
32  
33  
34  
35  
36  
37  
38  
39  
40  
41  
42  
43  
44  
45  
46  
47  
48  
49  
50  
51  
52  
53  
54  
55  
56  
57  
58  
59  
60

For peer review only

**Background:**

Chest pain, which is one of the main symptoms of acute coronary syndromes (ACS), is one of the most common reasons for ambulance callouts and presentations to emergency departments (EDs) (1, 2). However, most patients with chest pain who are transported by ambulance are ultimately diagnosed with self-limiting, non-cardiac disease. Thus, patients with chest pain tend to be systematically over-triaged, increasing ambulance resource utilisation, and contributing to ED crowding (2, 3).

Two EMS dispatch systems are currently used in the UK: the Advanced Medical Prioritizing Dispatching System (AMPDS), and the National Health Service (NHS 999) System (4). Both systems use computerized telephone triage software that identify life-threatening conditions by a series of questions at the beginning of the call. For patients with a primary complaint of chest pain, they also include a specific series of questions to identify ACS and triage the case using the patient's sign and symptoms (3, 5). However, systematic reviews have shown that there is only a low level of evidence to support the use of current triage systems (6, 7). There is also insufficient data on the dispatch protocol efficiency (7, 8). There is no consensus on the definitions used in Criteria Based Dispatch (CBD), which is the program used to triage patients by signs and symptoms, and AMPDS (9, 10). Also, there is no consensus on the accepted level for over- or under-triage for medical emergency dispatch (6, 9). Therefore, systematic over-triage for chest pain patients is used by dispatch systems to avoid potential harm to patients. EMS resource utilisation is increased as a result (6), and there are important differences between patients clinical findings when examined and dispatch priority (8, 9). Therefore, with the current clinical guidelines for emergency medical services (EMS), it is hard to rule in or rule out ACS by telephone-triage (11).

1  
2  
3  
4  
5 We aimed systematically to appraise the available evidence to determine the accuracy of  
6  
7  
8 decision aids that have been used for EMS telephone triage of patients with chest pain  
9  
10 suspected to be caused by ACS or life-threatening conditions.  
11  
12  
13

#### 14 **Methods:**

15  
16  
17  
18  
19 The systematic review was conducted in accordance with Preferred Reporting Items for  
20  
21  
22 Systematic Reviews and Meta-Analyses (PRISMA) guidelines and following Cochrane  
23  
24 methodology for diagnostic test accuracy reviews (12). A completed PRISMA checklist is  
25  
26 provided in supplementary appendix 1. This systematic review was pre-registered on the  
27  
28 International prospective register of systematic reviews (PROSPERO) database (reference  
29  
30 CRD42020171184)  
31  
32  
33  
34

#### 35 ***Search strategy and eligibility criteria:***

36  
37  
38  
39 We searched the Embase 1974, Medline 1946, and Cinahl 1937 databases from 3/03/2020 to  
40  
41  
42 04/03/2020 for the terms “chest pain, telephone or dispatch, triage, ACS or AMI, life-  
43  
44 threatening conditions, and EMS or prehospital”. Retrospective and prospective cohort  
45  
46 studies written in English were eligible. Search strategy table is provided in supplementary  
47  
48 appendix 2.  
49  
50  
51  
52

#### 53 ***Studies included:***

54  
55  
56 Based on the inclusion criteria, titles and abstracts were independently screened and  
57  
58 shortlisted by two reviewers (AbA and ChR). The inclusion criteria were: (1) the study  
59  
60

1  
2  
3 included adult patients (>18 years); (2) the study included patients with a primary complaint  
4 of chest pain who called EMS for an ambulance; (3) the study evaluated dispatch triage  
5 priority; (4) the study provided data for a linked final diagnosis of ACS, acute myocardial  
6 infarction (AMI), or other life-threatening conditions. Two reviewers independently reviewed  
7 and screened potentially relevant full text papers to identify those fulfilling the inclusion  
8 criteria. Any discrepancies between the reviewers were resolved by a third reviewer (AhA).  
9  
10  
11  
12  
13  
14  
15  
16  
17  
18

19 ***Outcome measures:***

20  
21 The primary outcome was a diagnosis of ACS upon hospital admission, including ST  
22 elevation myocardial infarction (STEMI), non-ST elevation myocardial infarction (NSTEMI)  
23 and unstable angina. AMI (incorporating both STEMI and NSTEMI) is defined according to  
24 the universal definition of AMI (13). Unstable Angina is defined as sudden prolonged chest  
25 pain at rest >20 minutes, new onset severe angina, or previous angina that is increasing in  
26 severity of pain, duration of pain, and/or frequency (14).  
27  
28  
29  
30  
31  
32  
33  
34  
35  
36  
37

38 The secondary outcome was the diagnosis of a life-threatening condition associated with  
39 chest pain. Since there is no universal definition for life-threatening conditions associated  
40 with chest pain, we included all relevant data from the studies, regardless of the precise  
41 definition used for 'life-threatening conditions'.  
42  
43  
44  
45  
46  
47  
48

49 ***Methodological quality assessment:***

50  
51 The quality assessment of eligible articles was independently assessed by two reviewers  
52 (AhA and AbA), using a modified Quality Assessment of Diagnostic Accuracy Studies  
53 (QUADAS-2) tool to suit the purpose of this systematic review (15). Discrepancies between  
54 reviewers were solved by discussion.  
55  
56  
57  
58  
59  
60



1  
2  
3  
4  
5  
6  
7  
8  
9  
***Data extraction:***

10 After selecting the eligible studies, two investigators (AhA and AbA) used a standardised  
11 data extraction form to extract and collect data as study design, population, study period, and  
12 outcome. Also, both investigators extracted all data required for diagnostic accuracy  
13 assessment including 2x2 tables when available for dispatch priority and prediction models  
14 priority for suspected ACS, or life-threatening conditions.  
15  
16  
17  
18  
19  
20  
21  
22  
23  
24  
25

26  
27  
28  
29  
***Statistical analysis:***

30 In line with our protocol, we considered pooling sensitivities, specificities, negative and  
31 positive predictive values (NPV and PPV, respectively) by meta-analysis. However, after  
32 reviewing the final list of studies meeting inclusion criteria, the reviewers unanimously  
33 concluded that meta-analysis would have been inappropriate due to clear evidence of clinical  
34 heterogeneity between studies, and missing data. We therefore undertook a narrative  
35 synthesis of the existing evidence.  
36  
37  
38  
39  
40  
41  
42  
43  
44  
45  
46

47  
48  
49  
**Results:**

50  
51 In total, our literature search identified 553 potentially relevant articles of which 26 were  
52 considered potentially eligible for inclusion after screening titles and abstracts. Following  
53 independent full text review, 23 articles were excluded and 3 articles met the inclusion  
54  
55  
56  
57  
58  
59  
60

1  
2  
3 criteria for this review (Figure 1). Excluded studies with reason of exclusion is shown in the  
4  
5 supplementary appendix 3 (16-18).  
6  
7  
8  
9

### 10 **Study Characteristics and Quality Assessments:**

11  
12  
13  
14 General study characteristics are summarized in Table 1. Patient characteristics and study  
15  
16 weaknesses are summarised in Table 2. The number patients in each study with each  
17  
18 component of the outcome measures studied is summarised in Supplementary appendix 4  
19  
20 Table 1. The details of the prediction models identified, together with the test characteristics  
21  
22 (including sensitivity, specificity, NPV, and PPV) for the diagnosis of ACS and life-  
23  
24 threatening conditions are shown in Tables 3, 4.  
25  
26  
27  
28  
29

30  
31 The modified QUADAS-2 methodological quality assessment tool was used to assess all  
32  
33 eligible studies as shown in the supplementary appendix 5. A summary of the quality  
34  
35 assessment for each eligible study is shown in Figure 2. Two out of the three studies were  
36  
37 retrospective cohort studies and compared the dispatch triage for ambulance response priority  
38  
39 to the prediction model (16, 17) and one was prospective cohort study that only testing  
40  
41 prediction model accuracy (18). ACS was adjudicated by experts in only one study (18)  
42  
43 while the other two studies used the hospital final diagnosis of ACS, AMI, or life-threatening  
44  
45 conditions. All eligible studies utilized the appropriate ACS or AMI definitions at the time of  
46  
47 conducting the study.  
48  
49  
50  
51  
52  
53

### 54 **Summary of the existing evidence**

1  
2  
3 Gellerstedt *et al* derived a prediction model to detect AMI and life-threatening conditions  
4 patients calling for an emergency ambulance with chest pain. They aimed to effectively triage  
5 calls to determine the appropriate level of response (capable of providing advanced life  
6 support vs only basic life support). The final model used eight variables (age, gender, strong  
7 pain, dyspnoea, cold sweat, nausea, vertigo, and syncope) to calculate the probability of AMI  
8 or a life-threatening condition. Setting an arbitrary cut-off, the authors found that the model  
9 had greater sensitivity than and similar specificity to the judgement of the call handlers,  
10 which could potentially improve triage. However, performance of the model was only  
11 evaluated in the derivation set, with no validation presented (16).  
12  
13  
14  
15  
16  
17  
18  
19  
20  
21  
22  
23  
24  
25

26 In 2016, the same group derived a new prediction model in another study. They aimed to  
27 determine whether a computer-based decision support system could have superior accuracy  
28 for identifying life threatening conditions or ACS in patients who called for an emergency  
29 ambulance with chest pain. *Gellerstedt et al* collected data from patients who called 112  
30 complaining of chest pain using ten questions related to ACS with yes or no answers (17).  
31 They derived two prediction models based on those answers. The first prediction model (full  
32 model) incorporated data from all ten questions that dispatchers had asked, including: age,  
33 gender, central chest pain, high intensity pain, pain duration between 15 minutes and 24  
34 hours, aggravated pain when breathing or moving, abnormal breathing, cold sweat, diabetes  
35 or previous cardiovascular disease (CVD), previous ACS, and belief that symptoms are heart-  
36 related. The authors also derived a 'limited model', which only included variables that had a  
37 significant association with the presence of ACS or a life-threatening condition on bivariate  
38 analysis. These included: gender, age, central chest pain, high intensity pain, previous ACS,  
39 and a high priority based on dispatcher judgement. There was no significant difference in  
40 performance between the full model and limited model. However, both the limited and full  
41  
42  
43  
44  
45  
46  
47  
48  
49  
50  
51  
52  
53  
54  
55  
56  
57  
58  
59  
60

1  
2  
3 models had superior sensitivity to the priority assigned by dispatchers in practice, both for  
4 ACS (Table 3) and life-threatening conditions (Table 4), with similar specificity (17). The  
5  
6 model was derived in 70% of the available cohort and validated in the remaining 30%. The  
7  
8 authors state that performance was 'similar' in the validation set, although no further details  
9  
10 were provided.  
11  
12  
13  
14  
15  
16

17 Reuter *et al* used backward logistic regression to derive two separate prediction models to  
18 detect ACS among men and women, respectively (18). The male prediction model to detect  
19 ACS consisted of 8 variables, which are: age, smoking, severe pain, permanent pain,  
20 breathing non-related pain, retrosternal pain, radiating pain, and additional symptoms. The  
21 female prediction model to detect ACS consisted of four variables, which are: age >60 years,  
22 history of coronary artery disease, breathing non-related pain, and radiating pain.  
23  
24  
25  
26  
27  
28  
29  
30  
31  
32

33 The male prediction model had an area under the receiver operating characteristic curve  
34 (AUC) of 0.76 (95% CI 0.73 – 0.79) in the derivation set (70% of the sample, which was  
35 randomly selected), which was maintained at 0.76 (95% CI 0.73 – 0.80) in the internal  
36 validation set (30% of the cohort). However, while the female prediction model had a similar  
37 AUC in the derivation set (0.79, 95% CI 0.75 – 0.83), it had lower accuracy in the validation  
38 set (AUC 0.67, 95% CI 0.60 – 0.74). No data were presented to enable calculation of  
39 sensitivity, specificity, PPV or NPV, and the output of the model was not compared to  
40 standard care or clinical judgement.  
41  
42  
43  
44  
45  
46  
47  
48  
49  
50  
51  
52

## 53 Discussion

54  
55  
56  
57  
58  
59  
60

1  
2  
3 In this systematic review, we have identified three studies that presented the derivation of  
4 clinical prediction models to enhance the telephone triage of patients calling for an  
5 emergency ambulance with chest pain. None of the models presented had sufficiently high  
6 sensitivity to avoid the need for ambulance dispatch. While two of the prediction models  
7 were shown to have greater accuracy than standard dispatch systems, unfortunately the  
8 current evidence does not support the use of these prediction models in practice without  
9 further validation. However, the evidence to date does suggest that clinical prediction models  
10 for this use case could feasibly improve upon the accuracy of triage offered by standard EMS  
11 dispatch systems.  
12  
13  
14  
15  
16  
17  
18  
19  
20  
21  
22  
23  
24  
25

26 The original model derived by Gellerstedt *et al* (2006) used a now outdated definition of AMI  
27 (using creatine kinase-MB as the reference standard biomarker), meaning that the results  
28 could not be applied to modern clinical practice without further validation. The second model  
29 derived by Gellerstedt *et al* (2016) underwent internal validation, but full details that  
30 validation were not published. Finally, Reuter *et al* derived two prediction models (for men  
31 and women, respectively) but did not present sufficient data to compare their performance to  
32 standard care. The AUC for the male prediction model was 0.76, showing good overall  
33 accuracy. The prediction model for females had a poor AUC (0.67) on internal validation.  
34 We identified no prediction models that have undergone external validation.  
35  
36  
37  
38  
39  
40  
41  
42  
43  
44  
45  
46  
47  
48  
49

50 It is an extremely challenging task for dispatchers to identify ACS over the telephone as there  
51 are so many different causes of chest pain (11, 19, 20), and there is very limited information  
52 available at the time of the initial phone call. It has previously been reported that only 1 out  
53 of 18 patients who request an ambulance for a complaint of chest pain has ACS(3). While a  
54  
55  
56  
57  
58  
59  
60

1  
2  
3 validated prediction model would have clear benefits, this systematic review has identified no  
4  
5 validated tools that could be used in current practice.  
6  
7  
8  
9

10 It has also been reported that the AMPDS triage system is not an accurate tool for identifying  
11 ACS (3). Moreover, in Denmark, Criteria-based Danish index is used to triage emergency  
12 calls and it resulted in over-triage for 51% of chest pain calls as they were discharged without  
13 a specific diagnosis and AMI was only found in 11% of patients (2). Dispatch triage systems  
14 were constructed to prioritize the pre-hospital response based on a patient's condition. They  
15 were not intended to make diagnoses. Therefore, it important to highlight that the use of  
16 prediction models for telephone triage may not be expected to 'rule out' ACS but to identify  
17 patients who may safely receive a lower priority response, while correctly identifying the vast  
18 majority of those who require an urgent response.  
19  
20  
21  
22  
23  
24  
25  
26  
27  
28  
29  
30  
31  
32

33 It is clear that chest pain is a main symptom of ACS (2, 11, 19, 21-23). However, previous  
34 studies have shown that some ACS patients has been given lower priority during triage due to  
35 not having chest pain (3, 24). Deakin *et al* found that 13% of patients who called for an  
36 ambulance with confirmed ACS presented with no chest pain A study was conducted in  
37 Australia by Linda *et al* (25) to identify the sex differences in symptoms related to MI  
38 reported to EMS dispatch agrees with Deakin *et al* (3) and our findings that chest pain alone  
39 is not a solid predictor of MI. Among female patients who called for an ambulance and were  
40 finally diagnosed with MI only 54.4% presented with chest pain, while among male patients  
41 68.7% had chest pain. As a result, priority 1 allocation for women was 67% and for men 81%  
42 (25). Also, several studies have identified differences of symptoms reported by ACS patients.  
43  
44 Interestingly, as we found in this systematic review, symptoms of ACS differ between male  
45 and female patients (18, 19, 25). One of the studies included in the search developed two  
46  
47  
48  
49  
50  
51  
52  
53  
54  
55  
56  
57  
58  
59  
60

1  
2  
3 different prediction models for men and women. However, the female prediction model  
4  
5 failed to stand up to internal validation and should not be implemented (18). The most  
6  
7 common symptom with MI following chest pain is Shortness of Breath (SOB) which  
8  
9 appeared in 28.3% women vs 25.8% men. In patients presenting with no chest pain, SOB was  
10  
11 the most common symptom, occurring in 38% women vs 32% men. These findings agree  
12  
13 with what we have found as two studies that nausea, SOB and cold sweat were the most  
14  
15 common symptoms reported after chest pain (16, 17). Women with ACS are less likely to  
16  
17 present with chest pain when compared to men. This may explain the relative  
18  
19 underperformance of the female prediction model derived by Reuter *et al.*  
20  
21  
22  
23  
24  
25

### 26 **Future Research:**

27  
28  
29  
30 This systematic review has highlighted two potential areas for future research. First, the three  
31  
32 prediction models identified may add value over existing telephone triage algorithms but this  
33  
34 would require prospective external validation. Second, the existing evidence suggests that it  
35  
36 is feasible to derive a prediction model to enhance telephone triage for patients with  
37  
38 suspected ACS. The derivation and validation of a new, contemporary prediction model  
39  
40 could reduce the systematic over-triage of patients in future, while ensuring that those with  
41  
42 life-threatening conditions consistently receive an urgent response. However, given the risks  
43  
44 of delayed responses (e.g. 'time is muscle for patients with STEMI), a higher sensitivity than  
45  
46 has been observed in the studies identified is likely to be required.  
47  
48  
49  
50  
51  
52

### 53 **Patient and Public Involvement:**

54  
55  
56  
57 No Patient involved.  
58  
59  
60

**Ethical approval:**

Ethical approval is not required for this systematic review.

**Limitations:**

It is possible that some relevant papers were missed because we only included studies that have adult participants who are >18 years old and we excluded papers not published in English language. Unfortunately, we couldn't conduct a meta-analysis as there was variations between dispatch system tools and priority types. Also, there was a difference in the definition of life-threatening conditions definition between included studies.

**Conclusion:**

We have identified three clinical prediction models for telephone triage of patients with chest pain. While the models have been found to have greater accuracy than standard EMS dispatch systems, the level of evidence to support their use is currently low. Prospective external validation is therefore required. However, our findings do support the feasibility of deriving and validating clinical prediction models to reduce over-triage while ensuring urgent responses for those who need them most.

**Funding:**

The publication fee has been funded by the Division of Cardiovascular Sciences, University of Manchester, UK. No grant or award number.



1  
2  
3  
4  
5  
6  
7  
8  
9  
10  
11  
12  
13  
14  
15  
16  
17  
18  
19  
20  
21  
22  
23  
24  
25  
26  
27  
28  
29  
30  
31  
32  
33  
34  
35  
36  
37  
38  
39  
40  
41  
42  
43  
44  
45  
46  
47  
48  
49  
50  
51  
52  
53  
54  
55  
56  
57  
58  
59  
60

For peer review only

1  
2  
3 **Tables and Figures**  
4  
5  
6  
7

8 **Table 1: Characteristics of included studies.**  
9

10  
11  
12  
13  
14  
15  
16  
17  
18  
19  
20  
21  
22  
23  
24  
25  
26  
27  
28  
29  
30  
31  
32  
33  
34  
35  
36  
37  
38  
39  
40  
41  
42  
43  
44  
45  
46  
47  
48  
49  
50  
51  
52  
53  
54  
55

| Study ID                    | Year | Country | Study design                          | Sites | Study period                        |
|-----------------------------|------|---------|---------------------------------------|-------|-------------------------------------|
| Gellerstedt, et al.<br>(16) | 2006 | Sweden  | Prospective cohort study              | 1     | 3 months                            |
| Reuter, et al. (18)         | 2019 | France  | Follow-up prospective<br>cohort study | 1     | 18 months May 2010-<br>Nov 2011     |
| Gellerstedt, et al.<br>(17) | 2016 | Sweden  | Retrospective cohort study            | 1     | 7 months 1 may<br>2009- 28 Feb 2010 |

56  
57  
58  
59  
60

**Table 2: Study and patient characteristics of all studies included in the systematic review.**

| Study ID                 | N    | Population                                                                                        | Triage criteria                                                   | Exclusion criteria                                                        | Target condition                 | Study weaknesses                                                                                                                                            |
|--------------------------|------|---------------------------------------------------------------------------------------------------|-------------------------------------------------------------------|---------------------------------------------------------------------------|----------------------------------|-------------------------------------------------------------------------------------------------------------------------------------------------------------|
| Gellerstedt, et al. (16) | 503  | Patients who called for an ambulance and who were assessed by the dispatcher as having chest pain | Dispatcher judgement vs prediction model (derived in this cohort) | NA                                                                        | AMI, Life-Threatening Conditions | Retrospective, no sample size calculation, small sample size, out of date AMI reference standard (based on creatine kinase-MB rather than cardiac troponin) |
| Reuter, et al. (18)      | 3727 | Adult 18 old called for ambulance chest pain with final diagnosis.                                | Prediction model                                                  | Difficult communication, language barrier inability to speak with patient | ACS                              | Information bias, unclear how AMI was adjudicated.                                                                                                          |
| Gellerstedt, et al. (17) | 1942 | Patients who called 112 for an emergency ambulance with a complaint of chest pain                 | Dispatcher judgement vs prediction model                          | Lost diagnosis, or follow up.                                             | ACS, Life-Threatening Conditions | 95% CIs for test characteristics were not presented. Only internal validation completed, and the full results of                                            |

1  
2  
3  
4  
5  
6  
7  
8  
9  
10  
11  
12  
13  
14  
15  
16  
17  
18  
19  
20  
21  
22  
23  
24  
25  
26  
27  
28  
29  
30  
31  
32  
33  
34  
35  
36  
37  
38  
39  
40  
41  
42  
43  
44  
45  
46  
47  
48  
49  
50  
51  
52  
53  
54  
55  
56  
57  
58  
59  
60

|                                                                                                             |  |  |  |  |  |                                          |
|-------------------------------------------------------------------------------------------------------------|--|--|--|--|--|------------------------------------------|
|                                                                                                             |  |  |  |  |  | that validation<br>were not<br>presented |
| ACS: Acute Coronary Syndrome; AMI: Acute Myocardial Infraction; CI: Confidence Interval; NA: Not Available. |  |  |  |  |  |                                          |

For peer review only

**Table 3: Diagnostic accuracy of dispatch tools and prediction models for ACS.**

| ID                                                                                                                                                             | N     | Triage criteria                 | Sensitivity % | Specificity % | NPV %     | PPV %     | TP  | FP   | FN | TN  |
|----------------------------------------------------------------------------------------------------------------------------------------------------------------|-------|---------------------------------|---------------|---------------|-----------|-----------|-----|------|----|-----|
| Gellerstedt, et al. (16)                                                                                                                                       | 503   | Dispatch system (standard care) | 85.7%         | 26.9%         | 87.7      | 32.0<br>2 | 90  | 291  | 15 | 107 |
|                                                                                                                                                                | 503   | Prediction model                | 92.4%         | 28.6%         | 93.4      | 25.5      | 97  | 284  | 8  | 114 |
| Reuter, et al. (18)                                                                                                                                            | 2,363 | Male Prediction model           | NA            | NA            | NA        | NA        | NA  | NA   | NA | NA  |
|                                                                                                                                                                | 1,824 | Female Prediction model         | NA            | NA            | NA        | NA        | NA  | NA   | NA | NA  |
| Gellerstedt, et al. (17)                                                                                                                                       | 1,942 | Dispatch system                 | 82.6          | 39.9          | 94.3      | 15.9      | 194 | 1026 | 41 | 681 |
|                                                                                                                                                                |       | Full Prediction model           | 90.2          | 40.9          | 96.8      | 17.4      | 212 | 1008 | 23 | 699 |
|                                                                                                                                                                |       | Limited Prediction model        | 91.1          | 41.1          | 96.9<br>6 | 17.5      | 214 | 1006 | 22 | 701 |
| Abbreviations: NPV: Negative Predictive Value ; PPV: Positive Predictive Value ; TP: True Positive; FP: False Positive; FN: False Negative; TN: True Negative. |       |                                 |               |               |           |           |     |      |    |     |

**Table 4: Diagnostic accuracy of dispatch tools and prediction models for life-threatening conditions.**

| ID                          | N    | Triage criteria          | Sensitivity % | Specificity % | NPV % | PPV % | TP  | FP  | FN | TN  |
|-----------------------------|------|--------------------------|---------------|---------------|-------|-------|-----|-----|----|-----|
| Gellerstedt, et al.<br>(16) | 493  | Dispatch system          | 80.9          | 37.5          | 64.1  | 47.3  | 178 | 198 | 42 | 75  |
|                             | 493  | Prediction model         | 86.4          | 31.8          | 74.4  | 50.5  | 190 | 186 | 30 | 87  |
| Gellerstedt, et al.<br>(17) | 1944 | Dispatch system          | 76.5          | 39.8          | 89.9  | 19.5  | 238 | 983 | 73 | 650 |
|                             | 1944 | Full Prediction model    | 88.4          | 42.1          | 95    | 22.5  | 275 | 946 | 36 | 687 |
|                             | 1944 | Limited Prediction model | 88.7          | 42.1          | 95.1  | 22.6  | 276 | 945 | 35 | 688 |

1  
2  
3 **Supplementary appendix:**  
4

5 **Table 1: Number of patients with each individual outcome by study**  
6  
7  
8  
9

10  
11  
12  
13  
14  
15  
16  
17 **Legends to figures:**  
18

19  
20 **Figure 1: Flow diagram of study selection**  
21

22  
23 **Figure 2: QUADAS-2 assessment of eligible studies. Green = low risk; yellow = unclear;**  
24  
25 **red = high risk**  
26  
27  
28  
29

30 **A. Contributorship statement:**  
31

32 Ahmed Alotaibi: writing protocol, data search, data extraction, quality assessment, and  
33 writing.  
34

35 Abdulrahman Alghamdi: data search, data extraction, quality assessment.  
36

37 Charles Renard: data search, data extraction, quality assessment.  
38

39 Richard Body: protocol planning, writing, proofreading.  
40  
41  
42

43 **B. competing interests:**  
44

45 The authors declare that they have **no** conflict of **interest**  
46  
47  
48  
49  
50

51 **C. Funding:**  
52

53 The publication fee has been funded by the Division of Cardiovascular Sciences, University  
54 of Manchester, UK. No grant or award number.  
55  
56  
57  
58  
59  
60

1  
2  
3  
4  
5  
6  
7  
8  
9  
10  
11  
12  
13  
14  
15  
16  
17  
18  
19  
20  
21  
22  
23  
24  
25  
26  
27  
28  
29  
30  
31  
32  
33  
34  
35  
36  
37  
38  
39  
40  
41  
42  
43  
44  
45  
46  
47  
48  
49  
50  
51  
52  
53  
54  
55  
56  
57  
58  
59  
60

**D. Data sharing statement:**

All the data included were obtained from published articles.

For peer review only



## References:

1. Ezekowitz JA, Welsh RC, Weiss D, Chan M, Keeble W, Khadour F, et al. Providing Rapid Out of Hospital Acute Cardiovascular Treatment 4 (PROACT-4). *J Am Heart Assoc.* 2015;4(12).
2. Pedersen CK, Stengaard C, Friesgaard K, Dodt KK, Søndergaard HM, Terkelsen CJ, et al. Chest pain in the ambulance; prevalence, causes and outcome - a retrospective cohort study. *Scandinavian Journal of Trauma, Resuscitation and Emergency Medicine.* 2019;27(1):84.
3. Deakin CD, Sherwood DM, Smith A, Cassidy M. Does telephone triage of emergency (999) calls using Advanced Medical Priority Dispatch (AMPDS) with Department of Health (DH) call prioritisation effectively identify patients with an acute coronary syndrome? An audit of 42,657 emergency calls to Hampshire Ambulance Service NHS Trust. *Emergency medicine journal : EMJ.* 2006;23(3):232-5.
4. Durham M, Faulkner M, Deakin C. Targeted response? An exploration of why ambulance services find government targets particularly challenging. *British Medical Bulletin.* 2016;120(1):35-42.
5. Janette Turner RJ, Annabel Crum, Joanne Coster, Tony Stone, Jone Nicholl. *Ambulance Response Programme.* 2017.
6. Bohm K, Kurland L. The accuracy of medical dispatch - a systematic review. *Scandinavian journal of trauma, resuscitation and emergency medicine.* 2018;26(1):94-.
7. Lidal IB, Holte HH, Vist GE. Triage systems for pre-hospital emergency medical services - a systematic review. *Scandinavian Journal of Trauma, Resuscitation and Emergency Medicine.* 2013;21(1):28.
8. Hoikka M, Länkimäki S, Silfvast T, Ala-Kokko TI. Medical priority dispatch codes—comparison with National Early Warning Score. *Scandinavian Journal of Trauma, Resuscitation and Emergency Medicine.* 2016;24(1):142.
9. Dami F, Golay C, Pasquier M, Fuchs V, Carron P-N, Hugli O. Prehospital triage accuracy in a criteria based dispatch centre. *BMC emergency medicine.* 2015;15:32-.
10. Torlén K, Kurland L, Castrén M, Olanders K, Bohm K. A comparison of two emergency medical dispatch protocols with respect to accuracy. *Scandinavian Journal of Trauma, Resuscitation and Emergency Medicine.* 2017;25(1):122.
11. Colbeck M. Paramedic diagnosis of acute coronary syndrome in the out-of-hospital patient with acute, non-traumatic chest pain. *Australasian Journal of Paramedicine.* 2016;13(4).
12. Moher D, Liberati A, Tetzlaff J, Altman DG. Preferred reporting items for systematic reviews and meta-analyses: the PRISMA statement. *J Clin Epidemiol.* 2009;62(10):1006-12.
13. Thygesen K, Alpert JS, Jaffe AS, Chaitman BR, Bax JJ, Morrow DA, et al. Fourth universal definition of myocardial infarction (2018). *Eur Heart J.* 2019;40(3):237-69.
14. Yusuf SW. Unstable Angina. *BMJ Best Practice.* 2018.
15. Whiting PF, Rutjes AWS, Westwood ME, Mallett S, Deeks JJ, Reitsma JB, et al. QUADAS-2: A Revised Tool for the Quality Assessment of Diagnostic Accuracy Studies. *Annals of Internal Medicine.* 2011;155(8):529-36.
16. Gellerstedt M, Bang A, Herlitz J. Could a computer-based system including a prevalence function support emergency medical systems and improve the allocation of life support level? *Eur J Emerg Med.* 2006;13(5):290-4.
17. Gellerstedt M, Rawshani N, Herlitz J, Bång A, Gelang C, Andersson J-O, et al. Could prioritisation by emergency medicine dispatchers be improved by using computer-based

- 1  
2  
3 decision support? A cohort of patients with chest pain. *International Journal of Cardiology*.  
4 2016;220:734-8.  
5  
6 18. Reuter P-G, Pradeau C, Huo Yung Kai S, Lhermusier T, Bourdé A, Tentillier E, et al.  
7 Predicting acute coronary syndrome in males and females with chest pain who call an  
8 emergency medical communication centre. *Scandinavian Journal of Trauma, Resuscitation  
9 and Emergency Medicine*. 2019;27(1):92.  
10  
11 19. Wouters LT, Zwart DL, Erkelens DC, Cheung NS, de Groot E, Damoiseaux RA, et al.  
12 Chest discomfort at night and risk of acute coronary syndrome: cross-sectional study of  
13 telephone conversations. *Family Practice*. 2020.  
14  
15 20. Kelly A-M. The FAMOUS TRIAGE trial: Pre-hospital chest pain research  
16 challenging the paradigm. *Emergency Medicine Australasia*. 2018;30(4):594-  
17  
18 21. Alghamdi A, Howard L, Reynard C, Moss P, Jarman H, Mackway-Jones K, et al.  
19 Enhanced triage for patients with suspected cardiac chest pain: the History and  
20 Electrocardiogram-only Manchester Acute Coronary Syndromes decision aid. *European  
21 Journal of Emergency Medicine*. 2019;26(5):356-61.  
22  
23 22. Sax DR, Vinson DR, Yamin CK, Huang J, Falck TM, Bhargava R, et al. Tele-Triage  
24 Outcomes For Patients With Chest Pain: Comparing Physicians And Registered Nurses.  
25 *Health Affairs*. 2018;37(12):1997-2004.  
26  
27 23. Svensson L, Isaksson L, Axelsson C, Nordlander R, Herlitz J. Predictors of  
28 myocardial damage prior to hospital admission among patients with acute chest pain or other  
29 symptoms raising a suspicion of acute coronary syndrome. *Coron Artery Dis*.  
30 2003;14(3):225-31.  
31  
32 24. Herlitz J, Starke M, Hansson E, Ringvall E, Karlson BW, Waagstein L. Early  
33 identification of patients with an acute coronary syndrome as assessed by dispatchers and the  
34 ambulance crew. *The American Journal of Emergency Medicine*. 2002;20(3):196-201.  
35  
36 25. Coventry LL, Bremner AP, Jacobs IG, Finn J. Myocardial Infarction: Sex Differences  
37 in Symptoms Reported to Emergency Dispatch. *Prehospital Emergency Care*.  
38 2013;17(2):193-202.  
39  
40  
41  
42  
43  
44  
45  
46  
47  
48  
49  
50  
51  
52  
53  
54  
55  
56  
57  
58  
59  
60

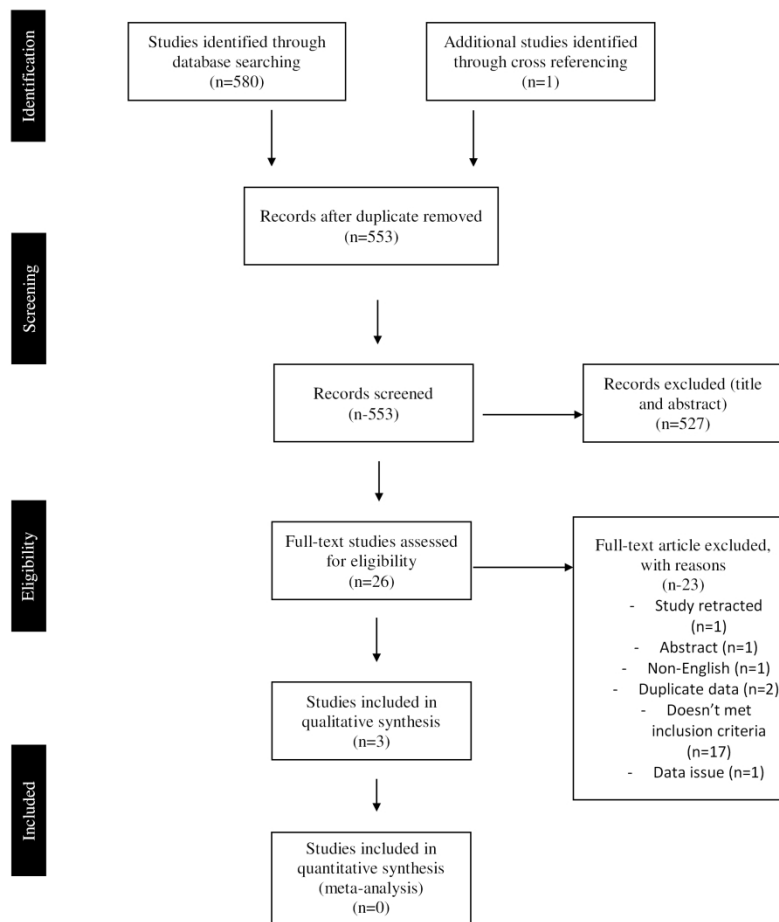

Figure 1: Flow diagram of study selection

209x297mm (300 x 300 DPI)

1  
2  
3  
4  
5  
6  
7  
8  
9  
10  
11  
12  
13  
14  
15  
16  
17  
18  
19  
20  
21  
22  
23  
24  
25  
26  
27  
28  
29  
30  
31  
32  
33  
34  
35  
36  
37  
38  
39  
40  
41  
42  
43  
44  
45  
46  
47  
48  
49  
50  
51  
52  
53  
54  
55  
56  
57  
58  
59  
60

|                    | Risk of bias            |                    |                         | Concerns regarding applicability |                    |                         |
|--------------------|-------------------------|--------------------|-------------------------|----------------------------------|--------------------|-------------------------|
|                    | Gellerstedt et al, 2016 | Reuter et al, 2019 | Gellerstedt et al, 2006 | Gellerstedt et al, 2016          | Reuter et al, 2019 | Gellerstedt et al, 2006 |
| Flow and timing    | Low                     | Low                | Low                     | N/A                              |                    |                         |
| Reference standard | Low                     | Low                | High                    | Low                              | Low                | High                    |
| Index test         | Unclear                 | Unclear            | Unclear                 | Low                              | Low                | High                    |
| Patient selection  | Low                     | Low                | Low                     | Low                              | Low                | Low                     |

Figure 2: QUADAS-2 assessment of eligible studies.

338x190mm (200 x 200 DPI)

## The PRISMA for Abstracts Checklist

| TITLE                                     | CHECKLIST ITEM                                                                                                                                                                                       | REPORTED ON PAGE #              |
|-------------------------------------------|------------------------------------------------------------------------------------------------------------------------------------------------------------------------------------------------------|---------------------------------|
| 1. Title:                                 | Identify the report as a systematic review, meta-analysis, or both.                                                                                                                                  | 1                               |
| <b>BACKGROUND</b>                         |                                                                                                                                                                                                      |                                 |
| 2. Objectives:                            | The research question including components such as participants, interventions, comparators, and outcomes.                                                                                           | 2 (objectives)                  |
| <b>METHODS</b>                            |                                                                                                                                                                                                      |                                 |
| 3. Eligibility criteria:                  | Study and report characteristics used as criteria for inclusion.                                                                                                                                     | 2 (eligibility criteria)        |
| 4. Information sources:                   | Key databases searched and search dates.                                                                                                                                                             | 2 (data sources)                |
| 5. Risk of bias:                          | Methods of assessing risk of bias.                                                                                                                                                                   | 2 (data extraction & synthesis) |
| <b>RESULTS</b>                            |                                                                                                                                                                                                      |                                 |
| 6. Included studies:                      | Number and type of included studies and participants and relevant characteristics of studies.                                                                                                        | 3 (results)                     |
| 7. Synthesis of results:                  | Results for main outcomes (benefits and harms), preferably indicating the number of studies and participants for each. If meta-analysis was done, include summary measures and confidence intervals. | 3 (results)                     |
| 8. Description of the effect:             | Direction of the effect (i.e. which group is favoured) and size of the effect in terms meaningful to clinicians and patients.                                                                        | N/A (no meta-analysis)          |
| <b>DISCUSSION</b>                         |                                                                                                                                                                                                      |                                 |
| 9. Strengths and Limitations of evidence: | Brief summary of strengths and limitations of evidence (e.g. inconsistency, imprecision, indirectness, or risk of bias, other supporting or conflicting evidence)                                    | 3 (conclusions)                 |

1  
2  
3  
4  
5  
6  
7  
8  
9  
10  
11  
12  
13  
14  
15  
16  
17  
18  
19  
20  
21  
22  
23  
24  
25  
26  
27  
28  
29  
30  
31  
32  
33  
34  
35  
36  
37  
38  
39  
40  
41  
42  
43  
44  
45  
46

|                     |                                                                  |                     |
|---------------------|------------------------------------------------------------------|---------------------|
| 10. Interpretation: | General interpretation of the results and important implications | 3<br>(conclusions)  |
| <b>OTHER</b>        |                                                                  |                     |
| 11. Funding:        | Primary source of funding for the review.                        | 4 (funding)         |
| 12. Registration:   | Registration number and registry name.                           | 4<br>(registration) |

For peer review only

## Search Strategy

EMBASE database:

Date of Search: 03/03/2020

Final Result: 98 Articles.

| Search Number | Keywords                                                                                              | Result  |
|---------------|-------------------------------------------------------------------------------------------------------|---------|
| 1             | chest pain.mp. or exp thorax pain/                                                                    | 100365  |
| 2             | dispatch.mp. or exp emergency medical dispatch/ or<br>exp emergency health service/ or exp ambulance/ | 104949  |
| 3             | telephone.mp. or exp telephone/                                                                       | 87404   |
| 4             | phone.mp.                                                                                             | 46215   |
| 5             | exp heart infarction/ or myocardial infraction.mp. or<br>exp acute heart infarction/ or exp adult/    | 8159567 |
| 6             | 3 or 4                                                                                                | 127453  |
| 7             | prehospital.mp.                                                                                       | 16529   |
| 8             | 2 or 7                                                                                                | 114149  |
| 9             | 1 and 5 and 6 and 8                                                                                   | 98      |

MEDLINE database:

Date of search: 04/03/2020

Final result: 464

| Search Number | Keywords                                                                                     | Result |
|---------------|----------------------------------------------------------------------------------------------|--------|
| 1             | chest pain.mp. or exp Chest Pain/                                                            | 70473  |
| 2             | acute coronary syndrome.mp. or exp Myocardial<br>Infarction/ or exp Acute Coronary Syndrome/ | 189638 |
| 3             | telephone.mp. or exp telephone/                                                              | 64080  |
| 4             | phone.mp.                                                                                    | 21109  |
| 5             | exp Emergency Medical Services/ or prehospital.mp.                                           | 139582 |
| 6             | triage.mp. or exp Triage/                                                                    | 18912  |
| 7             | emergency health services.mp. or Emergency Medical<br>Services/                              | 42024  |
| 8             | 3 or 4 or 6                                                                                  | 91939  |
| 9             | 5 or 7                                                                                       | 139622 |
| 10            | 1 and 2 and 8 and 9                                                                          | 464    |

| Study                                                        | Reason for exclusion                                                                                       |
|--------------------------------------------------------------|------------------------------------------------------------------------------------------------------------|
| (Deakin et al. 2006)                                         | Included all medical (non-chest pain) calls as TN.                                                         |
| (Scott et al. 2017)                                          | The authors didn't provide details on dispatch priority or sensitivity of triage accuracy.                 |
| (Herlitz et al. 2002)                                        | Population Included based on any symptom that raise suspicion of AMI.                                      |
| (Rawshani et al. 2017)                                       | Duplicate data.                                                                                            |
| (Grzybowski et al. 2000)                                     | No dispatch triage priority or sensitivity of triage accuracy.                                             |
| (Plat et al. 2018)                                           | Included all medical calls not only chest pain.                                                            |
| (Ball et al. 2016)                                           | Included all medical and trauma calls.                                                                     |
| (Sporer et al. 2008)                                         | Included all patients transported by ambulance.                                                            |
| (Andersen et al. 2016)                                       | included chronic diseases patients.                                                                        |
| (Wouters et al. 2020)                                        | Included patients called out of hours primary care not the emergency medical services.                     |
| (Rawshani et al. 2016)                                       | Duplicate data.                                                                                            |
| (Sørensen et al. 2013)                                       | Included patients based on ECG findings                                                                    |
| (Thakore, McGugan, and Morrison 2002; Braunwald et al. 2002) | Included medical and trauma conditions.                                                                    |
| (Higgins et al. 1993)                                        | Included patients who arrived to ED only.                                                                  |
| (Nehme, Andrew, and Smith 2016)                              | Measuring response time to time critical emergencies with no final diagnosis.                              |
| (Clawson et al. 2018)                                        | Included AMI confirmed cases only and didn't provide non-cardiac chest pain to measure accuracy.           |
| (Sporer and Wilson 2013)                                     | Measured triage for accurately sending ALS or BLS team for drug administration.                            |
| (Adams et al. 2010)                                          | No dispatch triage. Prioritizing patients based on ECG findings.                                           |
| (Manzo-Silberman et al. 2015)                                | Calls collected from general practitioner and EMS dispatch with no linkage of priority to final diagnosis. |
| (Pedersen et al. 2019)                                       | No dispatch priority assigned to the final diagnosis.                                                      |
| (Carmen Martín-Castro 2001)                                  | Non-English.                                                                                               |
| (Pandey and Khandekar 2009)                                  | Article retracted due to data issue.                                                                       |
| (Bhargava et al. 2012)                                       | Abstract.                                                                                                  |



## Reference list:

- Adams, R., Y. Appelman, J. G. Bronzwaer, T. Slagboom, G. Amoroso, P. van Exter, G. P. Tijssen, and R. J. de Winter. 2010. 'Implementation of a prehospital triage system for patients with chest pain and logistics for primary percutaneous coronary intervention in the region of Amsterdam, the Netherlands', *Am J Cardiol*, 106: 931-5.
- Andersen, M. S., E. F. Christensen, S. B. Jepsen, J. Nørtved, J. B. Hansen, and S. P. Johnsen. 2016. 'Can public health registry data improve Emergency Medical Dispatch?', *Acta Anaesthesiologica Scandinavica*, 60: 370-79.
- Ball, S. J., T. A. Williams, K. Smith, P. Cameron, D. Fatovich, K. L. O'Halloran, D. Hendrie, A. Whiteside, M. Inoue, D. Brink, I. Langridge, G. Pereira, H. Tohira, S. Chinnery, J. E. Bray, P. Bailey, and J. Finn. 2016. 'Association between ambulance dispatch priority and patient condition', *Emerg Med Australas*, 28: 716-24.
- Bhargava, Reena, L. Temkin Tanya, Bruce Fireman, Eleanor Levin, and Debbie Amaral. 2012. 'Abstract 17664: Outcomes of Chest Pain Calls to an Advice and Appointment Call Center', *Circulation*, 126: A17664-A64.
- Braunwald, E., E. M. Antman, J. W. Beasley, R. M. Califf, M. D. Cheitlin, J. S. Hochman, R. H. Jones, D. Kereiakes, J. Kupersmith, T. N. Levin, C. J. Pepine, J. W. Schaeffer, E. E. Smith, 3rd, D. E. Steward, P. Theroux, R. J. Gibbons, J. S. Alpert, D. P. Faxon, V. Fuster, G. Gregoratos, L. F. Hiratzka, A. K. Jacobs, and S. C. Smith, Jr. 2002. 'ACC/AHA 2002 guideline update for the management of patients with unstable angina and non-ST-segment elevation myocardial infarction--summary article: a report of the American College of Cardiology/American Heart Association task force on practice guidelines (Committee on the Management of Patients With Unstable Angina)', *J Am Coll Cardiol*, 40: 1366-74.
- Carmen Martín-Castro, Pilar Navarro-Pérez, Gabriel Jiménez-Moral, Ramón Caraballo-Daza, J. Manuel Martín-Vázquez less. 2001. 'Validación de un protocolo telefónico para cardiopatía isquémica en emergencias sanitarias', *elsevier*
- Clawson, J. J., I. Gardett, G. Scott, C. Fivaz, T. Barron, M. Broadbent, and C. Olola. 2018. 'Hospital-Confirmed Acute Myocardial Infarction: Prehospital Identification Using the Medical Priority Dispatch System', *Prehosp Disaster Med*, 33: 29-35.
- Deakin, C. D., D. M. Sherwood, A. Smith, and M. Cassidy. 2006. 'Does telephone triage of emergency (999) calls using Advanced Medical Priority Dispatch (AMPDS) with Department of Health (DH) call prioritisation effectively identify patients with an acute coronary syndrome? An audit of 42,657 emergency calls to Hampshire Ambulance Service NHS Trust', *Emergency medicine journal : EMJ*, 23: 232-35.
- Grzybowski, M., R. J. Zalenski, M. A. Ross, and B. Bock. 2000. 'A prediction model for prehospital triage of patients with suspected cardiac ischemia', *J Electrocardiol*, 33 Suppl: 253-8.
- Herlitz, Johan, Mia Starke, Elisabeth Hansson, Eva Ringvall, Björn W. Karlson, and Lisbeth Waagstein. 2002. 'Early identification of patients with an acute coronary syndrome as assessed by dispatchers and the ambulance crew', *The American Journal of Emergency Medicine*, 20: 196-201.
- Higgins, G. L., 3rd, C. T. Lambrew, E. Hunt, K. L. Wallace, M. W. Foure, J. R. Shryock, and D. L. Redfield. 1993. 'Expediting the early hospital care of the adult patient with

- 1  
2  
3 nontraumatic chest pain: impact of a modified ED triage protocol', *Am J Emerg Med*,  
4 11: 576-82.  
5  
6 Manzo-Silberman, S., N. Assez, B. Vivien, K. Tazarourte, T. Mokni, V. Bounes, A. Greffet, V.  
7 Bataille, G. Mulak, P. Goldstein, J. L. Ducassé, C. Spaulding, and S. Charpentier. 2015.  
8 'Management of non-traumatic chest pain by the French Emergency Medical  
9 System: Insights from the DOLORES registry', *Arch Cardiovasc Dis*, 108: 181-8.  
10  
11 Nehme, Ziad, Emily Andrew, and Karen Smith. 2016. 'Factors Influencing the Timeliness of  
12 Emergency Medical Service Response to Time Critical Emergencies', *Prehospital  
13 Emergency Care*, 20: 783-91.  
14  
15 Pandey, Anurag, and Rajiv B. Khandekar. 2009. "Evaluating The Effectiveness Of Telephone  
16 Triage For Priority Emergency Ambulance Dispatch." In.  
17  
18 Pedersen, Claus Kjær, Carsten Stengaard, Kristian Friesgaard, Karen Kaae Dodt, Hanne  
19 Maare Søndergaard, Christian Juhl Terkelsen, and Morten Thingemann Bøtker. 2019.  
20 'Chest pain in the ambulance; prevalence, causes and outcome - a retrospective  
21 cohort study', *Scandinavian Journal of Trauma, Resuscitation and Emergency  
22 Medicine*, 27: 84.  
23  
24 Plat, F. M., Y. A. S. Peters, F. J. Loots, C. J. A. de Groot, T. Eckhardt, E. Keizer, and P. Giesen.  
25 2018. 'Ambulance dispatch versus general practitioner home visit for highly urgent  
26 out-of-hours primary care', *Fam Pract*, 35: 440-45.  
27  
28 Rawshani, A., N. Rawshani, C. Gelang, J. O. Andersson, A. Larsson, A. Bång, J. Herlitz, and M.  
29 Gellerstedt. 2017. 'Emergency medical dispatch priority in chest pain patients due to  
30 life threatening conditions: A cohort study examining circadian variations and impact  
31 of the education', *Int J Cardiol*, 236: 43-48.  
32  
33 Rawshani, Nina, Araz Rawshani, Carita Gelang, Johan Herlitz, Angela Bång, Jan-Otto  
34 Andersson, and Martin Gellerstedt. 2016. 'Could ten questions asked by the dispatch  
35 center predict the outcome for patients with chest discomfort?', *International  
36 Journal of Cardiology*, 209: 223-25.  
37  
38 Scott, Greg, Jeff J. Clawson, Isabel Gardett, Meghan Broadbent, Nathan Williams, Conrad  
39 Fivaz, Gigi Marshall, Tracey Barron, and Christopher Olola. 2017. '9-1-1 Triage of  
40 Non-Traumatic Chest Pain: Association with Hospital Diagnosis', *Prehospital  
41 emergency care : official journal of the National Association of EMS Physicians and  
42 the National Association of State EMS Directors*, 21: 525-34.  
43  
44 Sørensen, Jacob Thorsted, Carsten Stengaard, Christina Ankjær Sørensen, Kristian Thygesen,  
45 Hans Erik Bøtker, Leif Thuesen, and Christian Juhl Terkelsen. 2013. 'Diagnosis and  
46 outcome in a prehospital cohort of patients with bundle branch block and suspected  
47 acute myocardial infarction', *European heart journal. Acute cardiovascular care*, 2:  
48 176-81.  
49  
50 Sporer, K. A., N. J. Johnson, C. C. Yeh, and G. M. Youngblood. 2008. 'Can emergency medical  
51 dispatch codes predict prehospital interventions for common 9-1-1 call types?',  
52 *Prehosp Emerg Care*, 12: 470-8.  
53  
54 Sporer, Karl A., and Keith G. Wilson. 2013. 'How Well Do Emergency Medical Dispatch Codes  
55 Predict Prehospital Medication Administration in a Diverse Urban Community?', *The  
56 Journal of Emergency Medicine*, 44: 413-22.e3.  
57  
58 Thakore, S., E. A. McGugan, and W. Morrison. 2002. 'Emergency ambulance dispatch: is  
59 there a case for triage?', *J R Soc Med*, 95: 126-9.  
60  
61 Wouters, Loes T., Dorien L. Zwart, Daphne C. Erkelens, Noël S. Cheung, Esther de Groot,  
62 Roger A. Damoiseaux, Arno W. Hoes, and Frans H. Rutten. 2020. 'Chest discomfort at

1  
2  
3 night and risk of acute coronary syndrome: cross-sectional study of telephone  
4 conversations', *Family Practice*.  
5  
6  
7  
8  
9  
10  
11  
12  
13  
14  
15  
16  
17  
18  
19  
20  
21  
22  
23  
24  
25  
26  
27  
28  
29  
30  
31  
32  
33  
34  
35  
36  
37  
38  
39  
40  
41  
42  
43  
44  
45  
46  
47  
48  
49  
50  
51  
52  
53  
54  
55  
56  
57  
58  
59  
60

For peer review only

1  
2  
3 **Supplementary appendix:**  
4

5 **Table 1: Number of patients with each individual outcome by study**  
6  
7  
8  
9

| Study                    | Total number of participants | ACS (N) %   | AMI (N) %   | STEMI (N) % | NSTEMI (N) % | LTC (N) %   |
|--------------------------|------------------------------|-------------|-------------|-------------|--------------|-------------|
| Gellerstedt, et al. (16) | 503                          | NA          | (105) 20.3% | NA          | NA           | (220) 43.7% |
| Reuter, et al. (18)      | 2363 Male                    | (508) 21.5% | NA          | (215) 9.1%  | (244) 10.3%  | NA          |
|                          | 1824 Female                  | (139) 7.6%  | NA          | (46) 2.5%   | (81) 4.4%    | NA          |
| Gellerstedt, et al. (17) | 1942                         | (235) 12.1% | NA          | NA          | NA           | NA          |
|                          | 1944                         | NA          | NA          | NA          | NA           | (311) 16%   |

# Supplementary Appendix

---

## Customised QUADAS-2 tool for telephone triage in chest pain systematic review

### Domain 1: Patient selection

#### A. Risk of bias

- |                                                             |                      |
|-------------------------------------------------------------|----------------------|
| a. Was a consecutive or random sample of patients enrolled? | Yes / No / Unclear   |
| b. Did the study avoid inappropriate exclusions?            | Yes / No / Unclear   |
| Could the selection of patients have introduced bias?       | Low / High / Unclear |

#### B. Concerns regarding applicability

- |                                                                           |                      |
|---------------------------------------------------------------------------|----------------------|
| Is there concern that included patients do not match the review question? | Low / High / Unclear |
|---------------------------------------------------------------------------|----------------------|

### OVERALL:

LOW: Patients who call 999, 911, 112, 108 or another number for emergency medical attention with a primary complaint of chest pain

HIGH: Selection of a specific high- or low-risk population; setting is not an emergency telephone consultation; convenience sampling with clear potential for systematic selection bias

UNCLEAR: Insufficient information to determine the risk of bias.

1  
2  
3  
4  
5  
6  
7  
8  
9  
10  
11  
12  
13  
14  
15  
16  
17  
18  
19  
20  
21  
22  
23  
24  
25  
26  
27  
28  
29  
30  
31  
32  
33  
34  
35  
36  
37  
38  
39  
40  
41  
42  
43  
44  
45  
46  
47

**Domain 2: Telephone triage intervention**

**A. Risk of bias**

- a. Was the outcome of telephone triage interpreted without knowledge of the outcome? Yes / No / Unclear
  - b. Is it unlikely that the telephone triage introduced biased risk group allocation? Yes / No / Unclear
- Could the scoring or interpretation of the telephone triage have introduced bias? Low / High / Unclear

**B. Concerns regarding applicability**

Is there concern that the telephone triage, its conduct, or interpretation differ from the review question? Low / High / Unclear

**OVERALL:**

LOW: Telephone triage outcome calculated prospectively by treating clinicians, blinded to patient outcome.

HIGH: Telephone triage outcome calculated without blinding to outcome. Retrospective calculation of telephone triage outcome.

UNCLEAR: Insufficient information.

1  
2  
3  
4 **Domain 3: AMI/serious adverse event allocation**  
5

6 **A. Risk of bias**

- 7 a. Was the universal definition of AMI used to define the reference standard? Yes / No / Unclear  
8 b. Was the reference standard adjudicated without knowledge of the telephone triage? Yes / No / Unclear  
9

10 Could the reference standard, its conduct, or its interpretation have introduced bias? Low / High / Unclear  
11  
12

13  
14 **B. Concerns regarding applicability**

15 Is there concern that the target condition as defined by the reference standard Low / High / Unclear  
16 does not match the review question?  
17  
18  
19  
20

21 **OVERALL:**  
22  
23

24 LOW: All patients underwent reference standard investigations for AMI including troponin sampling. The diagnosis of AMI was adjudicated by at least two  
25 investigators who were blinded to the telephone triage outcome. Serious adverse events include death (all cause), aortic dissection, pulmonary embolism and  
26 tension pneumothorax  
27

28  
29 HIGH: Outdated definition for AMI or definition inconsistent with the universal definition. The definition of serious adverse events does not include one of the  
30 core components specified above. Follow up procedure raises significant concerns about the possibility of missed events (e.g. chart review at a single centre  
31 without some assurance that this method would capture all relevant events).  
32

33  
34 UNCLEAR: Insufficient information.  
35  
36  
37  
38  
39  
40  
41  
42  
43  
44  
45  
46  
47

1  
2  
3  
4  
5  
6  
7  
8  
9  
10  
11  
12  
13  
14  
15  
16  
17  
18  
19  
20  
21  
22  
23  
24  
25  
26  
27  
28  
29  
30  
31  
32  
33  
34  
35  
36  
37  
38  
39  
40  
41  
42  
43  
44  
45  
46  
47

**Domain 4: Flow and timing**

**A. Risk of bias**

- a. Did all included patients receive an appropriate reference standard? Yes / No / Unclear
- b. Did patients receive the same reference standard? Yes / No / Unclear
- c. Follow-up procedure was sufficiently long to not miss relevant adverse events? Yes / No / Unclear
- d. Did no significant loss to follow up/exclusion due to incomplete records occur? Yes / No / Unclear

Could the patient flow have introduced bias? Low / High / Unclear

LOW: All patients underwent reference standard investigations for AMI including troponin sampling. Patients were followed up through their subsequent inpatient course or for at least 7 days.

HIGH: Not all patients were subjected to appropriate reference standard investigations including troponin sampling.

UNCLEAR: Insufficient information. This option includes lack of detail about troponin testing and the follow up procedure.

For peer review only





1  
2  
3  
4  
5  
6  
7  
8  
9  
10  
11  
12  
13  
14  
15  
16  
17  
18  
19  
20  
21  
22  
23  
24  
25  
26  
27  
28  
29  
30  
31  
32  
33  
34  
35  
36  
37  
38  
39  
40  
41  
42  
43  
44  
45  
46  
47

For peer review only

## The PRISMA for Abstracts Checklist

| TITLE                                     | CHECKLIST ITEM                                                                                                                                                                                       | REPORTED ON PAGE #              |
|-------------------------------------------|------------------------------------------------------------------------------------------------------------------------------------------------------------------------------------------------------|---------------------------------|
| 1. Title:                                 | Identify the report as a systematic review, meta-analysis, or both.                                                                                                                                  | 1                               |
| <b>BACKGROUND</b>                         |                                                                                                                                                                                                      |                                 |
| 2. Objectives:                            | The research question including components such as participants, interventions, comparators, and outcomes.                                                                                           | 2 (objectives)                  |
| <b>METHODS</b>                            |                                                                                                                                                                                                      |                                 |
| 3. Eligibility criteria:                  | Study and report characteristics used as criteria for inclusion.                                                                                                                                     | 2 (eligibility criteria)        |
| 4. Information sources:                   | Key databases searched and search dates.                                                                                                                                                             | 2 (data sources)                |
| 5. Risk of bias:                          | Methods of assessing risk of bias.                                                                                                                                                                   | 2 (data extraction & synthesis) |
| <b>RESULTS</b>                            |                                                                                                                                                                                                      |                                 |
| 6. Included studies:                      | Number and type of included studies and participants and relevant characteristics of studies.                                                                                                        | 3 (results)                     |
| 7. Synthesis of results:                  | Results for main outcomes (benefits and harms), preferably indicating the number of studies and participants for each. If meta-analysis was done, include summary measures and confidence intervals. | 3 (results)                     |
| 8. Description of the effect:             | Direction of the effect (i.e. which group is favoured) and size of the effect in terms meaningful to clinicians and patients.                                                                        | N/A (no meta-analysis)          |
| <b>DISCUSSION</b>                         |                                                                                                                                                                                                      |                                 |
| 9. Strengths and Limitations of evidence: | Brief summary of strengths and limitations of evidence (e.g. inconsistency, imprecision, indirectness, or risk of bias, other supporting or conflicting evidence)                                    | 3 (conclusions)                 |

1  
2  
3  
4  
5  
6  
7  
8  
9  
10  
11  
12  
13  
14  
15  
16  
17  
18  
19  
20  
21  
22  
23  
24  
25  
26  
27  
28  
29  
30  
31  
32  
33  
34  
35  
36  
37  
38  
39  
40  
41  
42  
43  
44  
45  
46

|                     |                                                                  |                     |
|---------------------|------------------------------------------------------------------|---------------------|
| 10. Interpretation: | General interpretation of the results and important implications | 3<br>(conclusions)  |
| <b>OTHER</b>        |                                                                  |                     |
| 11. Funding:        | Primary source of funding for the review.                        | 4 (funding)         |
| 12. Registration:   | Registration number and registry name.                           | 4<br>(registration) |

For peer review only
