# Supplementary material for: Accuracy of emergency medical services (EMS) telephone triage in identifying acute coronary syndrome (ACS) for patients with chest pain: a systematic literature review
Source: PubMed Central journal article supplement — BMJ Open. 2021 Aug 25;11(8):e045815. doi: 10.1136/bmjopen-2020-045815 (PMC8388270; doi:10.1136/bmjopen-2020-045815), 2021-08-25
Supplement: bmjopen-2020-045815supp001.pdf [file bmjopen-2020-045815supp001.pdf]

## The PRISMA for Abstracts Checklist

| TITLE                                     | CHECKLIST ITEM                                                                                                                                                                                       | REPORTED ON PAGE #              |
|-------------------------------------------|------------------------------------------------------------------------------------------------------------------------------------------------------------------------------------------------------|---------------------------------|
| 1. Title:                                 | Identify the report as a systematic review, meta-analysis, or both.                                                                                                                                  | 1                               |
| <b>BACKGROUND</b>                         |                                                                                                                                                                                                      |                                 |
| 2. Objectives:                            | The research question including components such as participants, interventions, comparators, and outcomes.                                                                                           | 2 (objectives)                  |
| <b>METHODS</b>                            |                                                                                                                                                                                                      |                                 |
| 3. Eligibility criteria:                  | Study and report characteristics used as criteria for inclusion.                                                                                                                                     | 2 (eligibility criteria)        |
| 4. Information sources:                   | Key databases searched and search dates.                                                                                                                                                             | 2 (data sources)                |
| 5. Risk of bias:                          | Methods of assessing risk of bias.                                                                                                                                                                   | 2 (data extraction & synthesis) |
| <b>RESULTS</b>                            |                                                                                                                                                                                                      |                                 |
| 6. Included studies:                      | Number and type of included studies and participants and relevant characteristics of studies.                                                                                                        | 3 (results)                     |
| 7. Synthesis of results:                  | Results for main outcomes (benefits and harms), preferably indicating the number of studies and participants for each. If meta-analysis was done, include summary measures and confidence intervals. | 3 (results)                     |
| 8. Description of the effect:             | Direction of the effect (i.e. which group is favoured) and size of the effect in terms meaningful to clinicians and patients.                                                                        | N/A (no meta-analysis)          |
| <b>DISCUSSION</b>                         |                                                                                                                                                                                                      |                                 |
| 9. Strengths and Limitations of evidence: | Brief summary of strengths and limitations of evidence (e.g. inconsistency, imprecision, indirectness, or risk of bias, other supporting or conflicting evidence)                                    | 3 (conclusions)                 |

|                     |                                                                  |                     |
|---------------------|------------------------------------------------------------------|---------------------|
| 10. Interpretation: | General interpretation of the results and important implications | 3<br>(conclusions)  |
| <b>OTHER</b>        |                                                                  |                     |
| 11. Funding:        | Primary source of funding for the review.                        | 4 (funding)         |
| 12. Registration:   | Registration number and registry name.                           | 4<br>(registration) |
