# Supplementary material for: Accuracy of emergency medical services (EMS) telephone triage in identifying acute coronary syndrome (ACS) for patients with chest pain: a systematic literature review
Source: PubMed Central journal article supplement — BMJ Open. 2021 Aug 25;11(8):e045815. doi: 10.1136/bmjopen-2020-045815 (PMC8388270; doi:10.1136/bmjopen-2020-045815), 2021-08-25
Supplement: bmjopen-2020-045815supp002.pdf [file bmjopen-2020-045815supp002.pdf]

### Search Strategy

EMBASE database:

Date of Search: 03/03/2020

Final Result: 98 Articles.

| Search Number | Keywords                                                                                           | Result  |
|---------------|----------------------------------------------------------------------------------------------------|---------|
| 1             | chest pain.mp. or exp thorax pain/                                                                 | 100365  |
| 2             | dispatch.mp. or exp emergency medical dispatch/ or exp emergency health service/ or exp ambulance/ | 104949  |
| 3             | telephone.mp. or exp telephone/                                                                    | 87404   |
| 4             | phone.mp.                                                                                          | 46215   |
| 5             | exp heart infarction/ or myocardial infraction.mp. or exp acute heart infarction/ or exp adult/    | 8159567 |
| 6             | 3 or 4                                                                                             | 127453  |
| 7             | prehospital.mp.                                                                                    | 16529   |
| 8             | 2 or 7                                                                                             | 114149  |
| 9             | 1 and 5 and 6 and 8                                                                                | 98      |

MEDLINE database:

Date of search: 04/03/2020

Final result: 464

| Search Number | Keywords                                                                                  | Result |
|---------------|-------------------------------------------------------------------------------------------|--------|
| 1             | chest pain.mp. or exp Chest Pain/                                                         | 70473  |
| 2             | acute coronary syndrome.mp. or exp Myocardial Infarction/ or exp Acute Coronary Syndrome/ | 189638 |
| 3             | telephone.mp. or exp telephone/                                                           | 64080  |
| 4             | phone.mp.                                                                                 | 21109  |
| 5             | exp Emergency Medical Services/ or prehospital.mp.                                        | 139582 |
| 6             | triage.mp. or exp Triage/                                                                 | 18912  |
| 7             | emergency health services.mp. or Emergency Medical Services/                              | 42024  |
| 8             | 3 or 4 or 6                                                                               | 91939  |
| 9             | 5 or 7                                                                                    | 139622 |
| 10            | 1 and 2 and 8 and 9                                                                       | 464    |
