# Supplementary material for: Accuracy of emergency medical services (EMS) telephone triage in identifying acute coronary syndrome (ACS) for patients with chest pain: a systematic literature review
Source: PubMed Central journal article supplement — BMJ Open. 2021 Aug 25;11(8):e045815. doi: 10.1136/bmjopen-2020-045815 (PMC8388270; doi:10.1136/bmjopen-2020-045815), 2021-08-25
Supplement: bmjopen-2020-045815supp003.pdf [file bmjopen-2020-045815supp003.pdf]

| Study                                                        | Reason for exclusion                                                                                       |
|--------------------------------------------------------------|------------------------------------------------------------------------------------------------------------|
| (Deakin et al. 2006)                                         | Included all medical (non-chest pain) calls as TN.                                                         |
| (Scott et al. 2017)                                          | The authors didn't provide details on dispatch priority or sensitivity of triage accuracy.                 |
| (Herlitz et al. 2002)                                        | Population Included based on any symptom that raise suspicion of AMI.                                      |
| (Rawshani et al. 2017)                                       | Duplicate data.                                                                                            |
| (Grzybowski et al. 2000)                                     | No dispatch triage priority or sensitivity of triage accuracy.                                             |
| (Plat et al. 2018)                                           | Included all medical calls not only chest pain.                                                            |
| (Ball et al. 2016)                                           | Included all medical and trauma calls.                                                                     |
| (Sporer et al. 2008)                                         | Included all patients transported by ambulance.                                                            |
| (Andersen et al. 2016)                                       | included chronic diseases patients.                                                                        |
| (Wouters et al. 2020)                                        | Included patients called out of hours primary care not the emergency medical services.                     |
| (Rawshani et al. 2016)                                       | Duplicate data.                                                                                            |
| (Sørensen et al. 2013)                                       | Included patients based on ECG findings                                                                    |
| (Thakore, McGugan, and Morrison 2002; Braunwald et al. 2002) | Included medical and trauma conditions.                                                                    |
| (Higgins et al. 1993)                                        | Included patients who arrived to ED only.                                                                  |
| (Nehme, Andrew, and Smith 2016)                              | Measuring response time to time critical emergencies with no final diagnosis.                              |
| (Clawson et al. 2018)                                        | Included AMI confirmed cases only and didn't provide non-cardiac chest pain to measure accuracy.           |
| (Sporer and Wilson 2013)                                     | Measured triage for accurately sending ALS or BLS team for drug administration.                            |
| (Adams et al. 2010)                                          | No dispatch triage. Prioritizing patients based on ECG findings.                                           |
| (Manzo-Silberman et al. 2015)                                | Calls collected from general practitioner and EMS dispatch with no linkage of priority to final diagnosis. |
| (Pedersen et al. 2019)                                       | No dispatch priority assigned to the final diagnosis.                                                      |
| (Carmen Martín-Castro 2001)                                  | Non-English.                                                                                               |
| (Pandey and Khandekar 2009)                                  | Article retracted due to data issue.                                                                       |
| (Bhargava et al. 2012)                                       | Abstract.                                                                                                  |

## Reference list:

- Adams, R., Y. Appelman, J. G. Bronzwaer, T. Slagboom, G. Amoroso, P. van Exter, G. P. Tijssen, and R. J. de Winter. 2010. 'Implementation of a prehospital triage system for patients with chest pain and logistics for primary percutaneous coronary intervention in the region of Amsterdam, the Netherlands', *Am J Cardiol*, 106: 931-5.
- Andersen, M. S., E. F. Christensen, S. B. Jepsen, J. Nørtved, J. B. Hansen, and S. P. Johnsen. 2016. 'Can public health registry data improve Emergency Medical Dispatch?', *Acta Anaesthesiologica Scandinavica*, 60: 370-79.
- Ball, S. J., T. A. Williams, K. Smith, P. Cameron, D. Fatovich, K. L. O'Halloran, D. Hendrie, A. Whiteside, M. Inoue, D. Brink, I. Langridge, G. Pereira, H. Tohira, S. Chinnery, J. E. Bray, P. Bailey, and J. Finn. 2016. 'Association between ambulance dispatch priority and patient condition', *Emerg Med Australas*, 28: 716-24.
- Bhargava, Reena, L. Temkin Tanya, Bruce Fireman, Eleanor Levin, and Debbie Amaral. 2012. 'Abstract 17664: Outcomes of Chest Pain Calls to an Advice and Appointment Call Center', *Circulation*, 126: A17664-A64.
- Braunwald, E., E. M. Antman, J. W. Beasley, R. M. Califf, M. D. Cheitlin, J. S. Hochman, R. H. Jones, D. Kereiakes, J. Kupersmith, T. N. Levin, C. J. Pepine, J. W. Schaeffer, E. E. Smith, 3rd, D. E. Steward, P. Theroux, R. J. Gibbons, J. S. Alpert, D. P. Faxon, V. Fuster, G. Gregoratos, L. F. Hiratzka, A. K. Jacobs, and S. C. Smith, Jr. 2002. 'ACC/AHA 2002 guideline update for the management of patients with unstable angina and non-ST-segment elevation myocardial infarction--summary article: a report of the American College of Cardiology/American Heart Association task force on practice guidelines (Committee on the Management of Patients With Unstable Angina)', *J Am Coll Cardiol*, 40: 1366-74.
- Carmen Martín-Castro, Pilar Navarro-Pérez, Gabriel Jiménez-Moral, Ramón Caraballo-Daza, J. Manuel Martín-Vázquez less. 2001. 'Validación de un protocolo telefónico para cardiopatía isquémica en emergencias sanitarias', *elsevier*
- Clawson, J. J., I. Gardett, G. Scott, C. Fivaz, T. Barron, M. Broadbent, and C. Olola. 2018. 'Hospital-Confirmed Acute Myocardial Infarction: Prehospital Identification Using the Medical Priority Dispatch System', *Prehosp Disaster Med*, 33: 29-35.
- Deakin, C. D., D. M. Sherwood, A. Smith, and M. Cassidy. 2006. 'Does telephone triage of emergency (999) calls using Advanced Medical Priority Dispatch (AMPDS) with Department of Health (DH) call prioritisation effectively identify patients with an acute coronary syndrome? An audit of 42,657 emergency calls to Hampshire Ambulance Service NHS Trust', *Emergency medicine journal : EMJ*, 23: 232-35.
- Grzybowski, M., R. J. Zalenski, M. A. Ross, and B. Bock. 2000. 'A prediction model for prehospital triage of patients with suspected cardiac ischemia', *J Electrocardiol*, 33 Suppl: 253-8.
- Herlitz, Johan, Mia Starke, Elisabeth Hansson, Eva Ringvall, Björn W. Karlson, and Lisbeth Waagstein. 2002. 'Early identification of patients with an acute coronary syndrome as assessed by dispatchers and the ambulance crew', *The American Journal of Emergency Medicine*, 20: 196-201.
- Higgins, G. L., 3rd, C. T. Lambrew, E. Hunt, K. L. Wallace, M. W. Fourre, J. R. Shryock, and D. L. Redfield. 1993. 'Expediting the early hospital care of the adult patient with

- nontraumatic chest pain: impact of a modified ED triage protocol', *Am J Emerg Med*, 11: 576-82.
- Manzo-Silberman, S., N. Assez, B. Vivien, K. Tazarourte, T. Mokni, V. Bounes, A. Greffet, V. Bataille, G. Mulak, P. Goldstein, J. L. Ducassé, C. Spaulding, and S. Charpentier. 2015. 'Management of non-traumatic chest pain by the French Emergency Medical System: Insights from the DOLORES registry', *Arch Cardiovasc Dis*, 108: 181-8.
- Nehme, Ziad, Emily Andrew, and Karen Smith. 2016. 'Factors Influencing the Timeliness of Emergency Medical Service Response to Time Critical Emergencies', *Prehospital Emergency Care*, 20: 783-91.
- Pandey, Anurag, and Rajiv B. Khandekar. 2009. "Evaluating The Effectiveness Of Telephone Triage For Priority Emergency Ambulance Dispatch." In.
- Pedersen, Claus Kjær, Carsten Stengaard, Kristian Friesgaard, Karen Kaae Dodt, Hanne Maare Søndergaard, Christian Juhl Terkelsen, and Morten Thingemann Bøtker. 2019. 'Chest pain in the ambulance; prevalence, causes and outcome - a retrospective cohort study', *Scandinavian Journal of Trauma, Resuscitation and Emergency Medicine*, 27: 84.
- Plat, F. M., Y. A. S. Peters, F. J. Loots, C. J. A. de Groot, T. Eckhardt, E. Keizer, and P. Giesen. 2018. 'Ambulance dispatch versus general practitioner home visit for highly urgent out-of-hours primary care', *Fam Pract*, 35: 440-45.
- Rawshani, A., N. Rawshani, C. Gelang, J. O. Andersson, A. Larsson, A. Bång, J. Herlitz, and M. Gellerstedt. 2017. 'Emergency medical dispatch priority in chest pain patients due to life threatening conditions: A cohort study examining circadian variations and impact of the education', *Int J Cardiol*, 236: 43-48.
- Rawshani, Nina, Araz Rawshani, Carita Gelang, Johan Herlitz, Angela Bång, Jan-Otto Andersson, and Martin Gellerstedt. 2016. 'Could ten questions asked by the dispatch center predict the outcome for patients with chest discomfort?', *International Journal of Cardiology*, 209: 223-25.
- Scott, Greg, Jeff J. Clawson, Isabel Gardett, Meghan Broadbent, Nathan Williams, Conrad Fivaz, Gigi Marshall, Tracey Barron, and Christopher Olola. 2017. '9-1-1 Triage of Non-Traumatic Chest Pain: Association with Hospital Diagnosis', *Prehospital emergency care : official journal of the National Association of EMS Physicians and the National Association of State EMS Directors*, 21: 525-34.
- Sørensen, Jacob Thorsted, Carsten Stengaard, Christina Ankjær Sørensen, Kristian Thygesen, Hans Erik Bøtker, Leif Thuesen, and Christian Juhl Terkelsen. 2013. 'Diagnosis and outcome in a prehospital cohort of patients with bundle branch block and suspected acute myocardial infarction', *European heart journal. Acute cardiovascular care*, 2: 176-81.
- Sporer, K. A., N. J. Johnson, C. C. Yeh, and G. M. Youngblood. 2008. 'Can emergency medical dispatch codes predict prehospital interventions for common 9-1-1 call types?', *Prehosp Emerg Care*, 12: 470-8.
- Sporer, Karl A., and Keith G. Wilson. 2013. 'How Well Do Emergency Medical Dispatch Codes Predict Prehospital Medication Administration in a Diverse Urban Community?', *The Journal of Emergency Medicine*, 44: 413-22.e3.
- Thakore, S., E. A. McGugan, and W. Morrison. 2002. 'Emergency ambulance dispatch: is there a case for triage?', *J R Soc Med*, 95: 126-9.
- Wouters, Loes T., Dorien L. Zwart, Daphne C. Erkelens, Noël S. Cheung, Esther de Groot, Roger A. Damoiseaux, Arno W. Hoes, and Frans H. Rutten. 2020. 'Chest discomfort at

night and risk of acute coronary syndrome: cross-sectional study of telephone conversations', *Family Practice*.
