# Supplementary material for: Accuracy of emergency medical services (EMS) telephone triage in identifying acute coronary syndrome (ACS) for patients with chest pain: a systematic literature review
Source: PubMed Central journal article supplement — BMJ Open. 2021 Aug 25;11(8):e045815. doi: 10.1136/bmjopen-2020-045815 (PMC8388270; doi:10.1136/bmjopen-2020-045815), 2021-08-25
Supplement: bmjopen-2020-045815supp004.pdf [file bmjopen-2020-045815supp004.pdf]

**Supplementary appendix:****Table 1: Number of patients with each individual outcome by study**

| Study                    | Total number of participants | ACS (N) %   | AMI (N) %   | STEMI (N) % | NSTEMI (N) % | LTC (N) %   |
|--------------------------|------------------------------|-------------|-------------|-------------|--------------|-------------|
| Gellerstedt, et al. (16) | 503                          | NA          | (105) 20.3% | NA          | NA           | (220) 43.7% |
| Reuter, et al. (18)      | 2363 Male                    | (508) 21.5% | NA          | (215) 9.1%  | (244) 10.3%  | NA          |
|                          | 1824 Female                  | (139) 7.6%  | NA          | (46) 2.5%   | (81) 4.4%    | NA          |
| Gellerstedt, et al. (17) | 1942                         | (235) 12.1% | NA          | NA          | NA           | NA          |
|                          | 1944                         | NA          | NA          | NA          | NA           | (311) 16%   |
